# Supplementary material for: Edible native plants of the Gulf of Mexico Province
Source: Biodivers Data J. 2022 Jun 3;10:e80565. doi: 10.3897/BDJ.10.e80565 (PMC9848560; doi:10.3897/BDJ.10.e80565)
Supplement: Supplementary material 2 — Geographical coordinates [file bdj-10-e80565-s002.csv]

family	genus	species	decimalLat	decimalLon	gbifID
Acanthaceae	Justicia	Justicia spicigera	20.05139	-97.07083	1896088264
Acanthaceae	Justicia	Justicia spicigera	19.55	-96.37806	1896208353
Acanthaceae	Justicia	Justicia spicigera	26.06972	-98.145	1895451166
Acanthaceae	Justicia	Justicia spicigera	19.32167	-96.58833	1893631998
Acanthaceae	Justicia	Justicia spicigera	18.375	-94.925	1418343220
Acanthaceae	Justicia	Justicia spicigera	17.27	-94.55694	1896208323
Acanthaceae	Justicia	Justicia spicigera	17.77694	-94.67694	1896088266
Acanthaceae	Justicia	Justicia spicigera	18.675	-96.775	1896208319
Acanthaceae	Justicia	Justicia spicigera	19.23	-96.58	1228212133
Acanthaceae	Justicia	Justicia spicigera	20.15833	-96.89167	1896261896
Acanthaceae	Justicia	Justicia spicigera	19.29028	-96.51056	1896261894
Acanthaceae	Justicia	Justicia spicigera	18.6568	-96.7656	1989470487
Acanthaceae	Justicia	Justicia spicigera	19.16972	-96.6975	1896261888
Acanthaceae	Justicia	Justicia spicigera	22.15139	-97.8225	1896261876
Acanthaceae	Justicia	Justicia spicigera	17.44167	-95.025	1896261901
Acanthaceae	Justicia	Justicia spicigera	18.63639	-96.73	1895451115
Acanthaceae	Justicia	Justicia spicigera	18.9132	-96.778	1989173714
Acanthaceae	Justicia	Justicia spicigera	19.3125	-96.9064	1989178749
Acanthaceae	Justicia	Justicia spicigera	18.5465	-96.7436	1989483649
Acanthaceae	Justicia	Justicia spicigera	19.13833	-97.12306	1896261886
Acanthaceae	Justicia	Justicia spicigera	18.04167	-93.325	1896261856
Acanthaceae	Justicia	Justicia spicigera	19.55667	-96.97333	1896261855
Acanthaceae	Justicia	Justicia spicigera	21.54167	-98.39167	1896261854
Acanthaceae	Justicia	Justicia spicigera	19.02306	-96.61444	1896261846
Acanthaceae	Justicia	Justicia spicigera	19.15194	-96.83361	1896261840
Acanthaceae	Justicia	Justicia spicigera	18.74	-96.55	1895504734
Acanthaceae	Justicia	Justicia spicigera	18.43333	-95.01667	1895451131
Acanthaceae	Justicia	Justicia spicigera	20.5275	-98.45472	1896261872
Acanthaceae	Justicia	Justicia spicigera	19.53	-96.47528	1896261868
Actinidiaceae	Saurauia	Saurauia cana	19.8	-96.833333	1894466431
Actinidiaceae	Saurauia	Saurauia cana	19.835556	-96.793055	2629624574
Actinidiaceae	Saurauia	Saurauia cana	19.8	-96.783	3307782677
Actinidiaceae	Saurauia	Saurauia cana	19.85245394	-96.57768638	1894466396
Actinidiaceae	Saurauia	Saurauia cana	19.782222	-96.7	1896063935
Adoxaceae	Sambucus	Sambucus canadensis	18.651306	-97.003194	2629750528
Adoxaceae	Sambucus	Sambucus canadensis	18.521	-95.16	3308110498
Adoxaceae	Sambucus	Sambucus canadensis	18.523056	-95.150833	2629599493
Adoxaceae	Sambucus	Sambucus canadensis	18.52049	-95.14916	3308663250
Adoxaceae	Sambucus	Sambucus canadensis	19.5525	-96.936389	2629751552
Adoxaceae	Sambucus	Sambucus canadensis	19.931667	-96.574167	2629742673
Adoxaceae	Sambucus	Sambucus canadensis	24.011111	-99.475281	1895352413
Adoxaceae	Sambucus	Sambucus canadensis	19.541083	-96.913136	2629667581
Adoxaceae	Sambucus	Sambucus canadensis	19.522222	-96.980555	2629733314
Adoxaceae	Sambucus	Sambucus canadensis	19.676944	-97.097222	2629671330
Adoxaceae	Sambucus	Sambucus canadensis	19.558333	-97.091667	1897335285
Adoxaceae	Sambucus	Sambucus canadensis	19.55	-97.083333	2629655722
Adoxaceae	Sambucus	Sambucus canadensis	19.55	-97.083	3308676909
Adoxaceae	Sambucus	Sambucus canadensis	19.466667	-96.983333	2629683100
Adoxaceae	Sambucus	Sambucus canadensis	19.467	-96.983	3308656175
Adoxaceae	Sambucus	Sambucus canadensis	19.73333	-96.8	3308524876
Adoxaceae	Sambucus	Sambucus canadensis	19.5	-96.916667	2629479836
Adoxaceae	Sambucus	Sambucus canadensis	19.75	-97.116667	2629657284
Adoxaceae	Sambucus	Sambucus canadensis	19.666667	-97.133333	2629659286
Adoxaceae	Sambucus	Sambucus canadensis	19.667	-97.167	3307813654
Adoxaceae	Sambucus	Sambucus canadensis	24.518056	-98.951667	1895352316
Adoxaceae	Sambucus	Sambucus canadensis	18.586111	-95.084722	2629618228
Adoxaceae	Sambucus	Sambucus canadensis	18.575	-95.069167	2629490299
Adoxaceae	Sambucus	Sambucus canadensis	20.667	-97.917	3307970558
Adoxaceae	Sambucus	Sambucus canadensis	18.509722	-95.104722	2629448224
Adoxaceae	Sambucus	Sambucus canadensis	19.533333	-97.083333	2629659288
Adoxaceae	Sambucus	Sambucus canadensis	19.65	-97.1	2629660256
Adoxaceae	Sambucus	Sambucus canadensis	19.728889	-97.009722	2629447239
Adoxaceae	Sambucus	Sambucus canadensis	19.496944	-97.106667	2629664226
Adoxaceae	Sambucus	Sambucus canadensis	19.517	-97.1	3307867402
Adoxaceae	Sambucus	Sambucus canadensis	19.517	-97.017	3307886989
Adoxaceae	Sambucus	Sambucus canadensis	19.226389	-96.870555	2629450234
Adoxaceae	Sambucus	Sambucus canadensis	18.033333	-93.316667	2629618227
Adoxaceae	Sambucus	Sambucus canadensis	19.85	-96.783333	2629487209
Adoxaceae	Sambucus	Sambucus canadensis	19.416667	-97.116667	2629483244
Adoxaceae	Sambucus	Sambucus canadensis	19.75	-96.766667	2629487208
Adoxaceae	Sambucus	Sambucus canadensis	19.65	-96.905	2629545899
Adoxaceae	Sambucus	Sambucus canadensis	19.831167	-96.816675	1895352338
Adoxaceae	Sambucus	Sambucus canadensis	18.566667	-95.083333	2629623225
Adoxaceae	Sambucus	Sambucus canadensis	18.833333	-97.166667	2629665615
Adoxaceae	Sambucus	Sambucus canadensis	20.366667	-98.35	1895352398
Adoxaceae	Sambucus	Sambucus canadensis	18.011275	-94.556958	1895352315
Adoxaceae	Sambucus	Sambucus canadensis	18.122903	-94.548326	2629532616
Adoxaceae	Sambucus	Sambucus canadensis	19.021667	-96.613333	2629670436
Amaranthaceae	Amaranthus	Amaranthus cruentus	19.688889	-96.910833	1896350879
Amaranthaceae	Amaranthus	Amaranthus cruentus	20.405	-97.29	1896350880
Amaranthaceae	Amaranthus	Amaranthus cruentus	19.480787	-96.933265	1896350889
Amaranthaceae	Amaranthus	Amaranthus cruentus	19.941667	-96.858333	1896350899
Amaranthaceae	Amaranthus	Amaranthus hybridus	19.555556	-96.766667	1418343415
Amaranthaceae	Amaranthus	Amaranthus hybridus	19.43333	-96.68333	1259338778
Amaranthaceae	Amaranthus	Amaranthus hybridus	19.503889	-96.614444	1893674000
Amaranthaceae	Amaranthus	Amaranthus hybridus	23.57126204	-99.85680525	1895487964
Amaranthaceae	Amaranthus	Amaranthus hybridus	18.35444	-92.61583	1259338796
Amaranthaceae	Amaranthus	Amaranthus hybridus	19.588889	-96.875	1418343554
Amaranthaceae	Amaranthus	Amaranthus hybridus	19.25	-96.56	1259338688
Amaranthaceae	Amaranthus	Amaranthus hybridus	19.21666	-97	1259338395
Amaranthaceae	Amaranthus	Amaranthus hybridus	18.35805	-92.41638	1259338600
Amaranthaceae	Amaranthus	Amaranthus hybridus	19.588889	-96.788889	1418346042
Amaranthaceae	Amaranthus	Amaranthus hybridus	19.483333	-96.933333	1421397067
Amaranthaceae	Amaranthus	Amaranthus hybridus	19.625	-96.875	1418345392
Amaranthaceae	Amaranthus	Amaranthus hybridus	19.54061939	-96.92755169	1895487886
Amaranthaceae	Amaranthus	Amaranthus hybridus	19.40201465	-96.99394182	1895487911
Amaranthaceae	Amaranthus	Amaranthus hybridus	19.611111	-96.916667	1418345115
Amaranthaceae	Amaranthus	Amaranthus hybridus	19.61	-96.95	1893673984
Amaranthaceae	Amaranthus	Amaranthus hybridus	19.5525	-96.94	1418347931
Amaranthaceae	Amaranthus	Amaranthus hybridus	19.191667	-96.308333	1418344229
Amaranthaceae	Amaranthus	Amaranthus hybridus	18.39444	-95.18333	1259339651
Amaranthaceae	Amaranthus	Amaranthus hybridus	19.483333	-96.95	1895487877
Amaranthaceae	Amaranthus	Amaranthus hybridus	19.37	-96.376667	1896329670
Amaranthaceae	Amaranthus	Amaranthus hybridus	19.610833	-96.915278	1896329668
Amaranthaceae	Amaranthus	Amaranthus hybridus	18.693835	-96.023672	1896329664
Amaranthaceae	Amaranthus	Amaranthus hybridus	17.268611	-94.502222	1896329661
Amaranthaceae	Amaranthus	Amaranthus hybridus	19.258333	-96.561944	1896329659
Amaranthaceae	Amaranthus	Amaranthus hybridus	18.843611	-96.851111	1896329676
Amaranthaceae	Amaranthus	Amaranthus hybridus	20.025	-96.641667	1896329677
Amaranthaceae	Amaranthus	Amaranthus hybridus	19.114444	-96.865833	1896329690
Amaranthaceae	Amaranthus	Amaranthus hybridus	19.18	-96.591667	1896329689
Amaranthaceae	Amaranthus	Amaranthus hybridus	19.4	-96.891667	1896329688
Amaranthaceae	Amaranthus	Amaranthus hybridus	19.565278	-96.874722	1896329658
Amaranthaceae	Amaranthus	Amaranthus hybridus	21.155	-97.7675	1896329682
Amaranthaceae	Amaranthus	Amaranthus hybridus	20.156944	-96.897222	1896329681
Amaranthaceae	Amaranthus	Amaranthus hybridus	18.786111	-96.803333	1896329657
Amaranthaceae	Amaranthus	Amaranthus hybridus	19.460833	-96.748056	1896329655
Amaranthaceae	Amaranthus	Amaranthus hybridus	19.45	-96.543889	1896329654
Amaranthaceae	Amaranthus	Amaranthus hybridus	18.825	-96.775	1896329625
Amaranthaceae	Amaranthus	Amaranthus hybridus	19.276389	-96.393333	1896329622
Amaranthaceae	Amaranthus	Amaranthus hybridus	19.458333	-96.958333	1896329620
Amaranthaceae	Amaranthus	Amaranthus hybridus	17.541667	-94.325	1896329631
Amaranthaceae	Amaranthus	Amaranthus hybridus	19.611389	-96.949444	1896329650
Amaranthaceae	Amaranthus	Amaranthus hybridus	18.870833	-96.996389	1896329649
Amaranthaceae	Amaranthus	Amaranthus hybridus	19.818333	-96.686111	1896329648
Amaranthaceae	Amaranthus	Amaranthus hybridus	19.050833	-96.984167	1896329647
Amaranthaceae	Amaranthus	Amaranthus hybridus	19.627222	-96.825	1896329644
Amaranthaceae	Amaranthus	Amaranthus hybridus	19.958056	-96.845278	1896329642
Amaranthaceae	Amaranthus	Amaranthus hybridus	19.225	-97.008333	1896329638
Amaranthaceae	Amaranthus	Amaranthus hybridus	19.508333	-96.941667	1896329637
Amaranthaceae	Amaranthus	Amaranthus hybridus	18.875	-96.881667	1896329632
Amaranthaceae	Amaranthus	Amaranthus hybridus	19.122222	-96.821389	1896329694
Amaranthaceae	Amaranthus	Amaranthus hybridus	19.708333	-97.141667	1896329695
Amaranthaceae	Amaranthus	Amaranthus hybridus	19.233333	-96.378333	1893674075
Amaranthaceae	Amaranthus	Amaranthus hybridus	19.208333	-97.025	1896329717
Amaranthaceae	Amaranthus	Amaranthus hybridus	18.075	-94.508333	1896329708
Amaranthaceae	Amaranthus	Amaranthus hybridus	19.235	-96.401944	1896329707
Amaranthaceae	Amaranthus	Amaranthus hybridus	18.896944	-96.997778	1896329703
Amaranthaceae	Amaranthus	Amaranthus hybridus	19.318056	-96.400556	1896329732
Amaranthaceae	Amaranthus	Amaranthus hybridus	19.353333	-96.566944	1896329726
Amaranthaceae	Amaranthus	Amaranthus hybridus	19.481944	-96.943611	1896329725
Amaranthaceae	Amaranthus	Amaranthus hybridus	25.948889	-97.151944	1895642085
Amaranthaceae	Amaranthus	Amaranthus hybridus	19.266667	-96.377222	1896329590
Amaranthaceae	Amaranthus	Amaranthus hybridus	19.541667	-96.691667	1896329588
Amaranthaceae	Amaranthus	Amaranthus hybridus	19.010833	-97.033333	1896329587
Amaranthaceae	Amaranthus	Amaranthus hybridus	18.158333	-92.781667	1896329583
Amaranthaceae	Amaranthus	Amaranthus hybridus	19.401389	-96.993889	1896329581
Amaranthaceae	Amaranthus	Amaranthus hybridus	19.225556	-96.368333	1896329580
Amaranthaceae	Amaranthus	Amaranthus hybridus	19.592778	-96.926944	1896329577
Amaranthaceae	Amaranthus	Amaranthus hybridus	18.836111	-97.028333	1896329592
Amaranthaceae	Amaranthus	Amaranthus hybridus	17.238889	-94.629444	1896329614
Amaranthaceae	Amaranthus	Amaranthus hybridus	18.752778	-96.766667	1896329613
Amaranthaceae	Amaranthus	Amaranthus hybridus	19.555556	-96.768056	1896329609
Amaranthaceae	Amaranthus	Amaranthus hybridus	19.7667	-96.6833	1837911893
Amaranthaceae	Amaranthus	Amaranthus hybridus	18.248056	-95.113056	1896329604
Amaranthaceae	Amaranthus	Amaranthus hybridus	19.235	-96.395	1896329601
Amaranthaceae	Amaranthus	Amaranthus hybridus	19.533333	-96.969444	1896329600
Amaranthaceae	Amaranthus	Amaranthus hybridus	19.54	-96.9275	1896329599
Amaranthaceae	Amaranthus	Amaranthus hybridus	18.348333	-94.738333	1896329595
Amaranthaceae	Amaranthus	Amaranthus hybridus	18.831667	-96.843611	1896329594
Amaranthaceae	Amaranthus	Amaranthus hybridus	19.735556	-96.671667	1896329593
Amaranthaceae	Amaranthus	Amaranthus hybridus	18.258333	-96.141667	1896329551
Amaranthaceae	Amaranthus	Amaranthus hybridus	18.936667	-96.759444	1896329548
Amaranthaceae	Amaranthus	Amaranthus hybridus	25.484167	-97.785	1895487941
Amaranthaceae	Amaranthus	Amaranthus hybridus	19.568333	-96.898611	1896329575
Amaranthaceae	Amaranthus	Amaranthus hybridus	19.525	-96.941667	1896329573
Amaranthaceae	Amaranthus	Amaranthus hybridus	19.312778	-96.404722	1896329572
Amaranthaceae	Amaranthus	Amaranthus hybridus	19.385278	-96.971667	1896329568
Amaranthaceae	Amaranthus	Amaranthus hybridus	18.845556	-96.953056	1896329567
Amaranthaceae	Amaranthus	Amaranthus hybridus	18.447778	-96.360556	1896329566
Amaranthaceae	Amaranthus	Amaranthus hybridus	18.850556	-96.869167	1896329556
Amaranthaceae	Amaranthus	Amaranthus hybridus	19.378889	-96.902778	1896329565
Amaranthaceae	Amaranthus	Amaranthus hybridus	19.339167	-96.490278	1896329564
Amaranthaceae	Amaranthus	Amaranthus hybridus	18.84	-96.793611	1896329563
Amaranthaceae	Amaranthus	Amaranthus hybridus	18.875	-96.863889	1896329560
Amaranthaceae	Amaranthus	Amaranthus hybridus	19.3175	-96.376389	1896329559
Amaranthaceae	Amaranthus	Amaranthus hybridus	19.228333	-96.673333	1893674038
Amaranthaceae	Amaranthus	Amaranthus hybridus	18.37416	-92.62944	1259340567
Amaranthaceae	Amaranthus	Amaranthus hybridus	19.627778	-96.825	1418340861
Amaranthaceae	Amaranthus	Amaranthus hybridus	19.281667	-96.441667	1893674018
Amaranthaceae	Amaranthus	Amaranthus hybridus	19.33	-96.425	1893674019
Amaranthaceae	Amaranthus	Amaranthus hybridus	18.858333	-96.908333	1894676779
Amaranthaceae	Amaranthus	Amaranthus hybridus	20.181667	-97.011667	1893674021
Amaranthaceae	Amaranthus	Amaranthus hybridus	21.52	-98.385	1893674027
Amaranthaceae	Amaranthus	Amaranthus hybridus	19.76	-96.673333	1893674023
Amaranthaceae	Amaranthus	Amaranthus hybridus	19.46666	-96.75	1259345030
Amaranthaceae	Amaranthus	Amaranthus hybridus	19.45	-96.75	1259346186
Amaranthaceae	Amaranthus	Amaranthus hybridus	19.691667	-97.113333	1893674061
Amaranthaceae	Amaranthus	Amaranthus hybridus	18.20694	-94.135	1259343517
Amaranthaceae	Amaranthus	Amaranthus hybridus	18.16	-95.19	1261454747
Amaranthaceae	Amaranthus	Amaranthus hybridus	19.340556	-96.5025	1893674057
Amaranthaceae	Amaranthus	Amaranthus hybridus	19.00833	-97.03333	1259343449
Amaranthaceae	Amaranthus	Amaranthus hybridus	17.995	-94.558333	1893674045
Amaranthaceae	Amaranthus	Amaranthus hybridus	19.45	-96.935	1893674052
Amaranthaceae	Amaranthus	Amaranthus hybridus	19.533333	-96.683333	1895487947
Amaranthaceae	Amaranthus	Amaranthus hybridus	17.927778	-94.896944	1896225135
Amaranthaceae	Amaranthus	Amaranthus hybridus	18.4275	-95.161667	1896225131
Amaranthaceae	Amaranthus	Amaranthus hybridus	18	-93.546667	1896225136
Amaranthaceae	Amaranthus	Amaranthus hybridus	19.45	-96.718889	1896225139
Amaranthaceae	Amaranthus	Amaranthus hybridus	22.255278	-97.868611	1896225140
Amaranthaceae	Amaranthus	Amaranthus hybridus	18.972778	-96.154444	1896225126
Amaranthaceae	Amaranthus	Amaranthus hybridus	18.212222	-93.395556	1894550927
Amaranthaceae	Amaranthus	Amaranthus hybridus	17.435	-91.404722	1894550949
Amaranthaceae	Amaranthus	Amaranthus hybridus	19.48	-96.95	1258458717
Amaranthaceae	Amaranthus	Amaranthus hybridus	19.51	-96.91	1258458697
Amaranthaceae	Amaranthus	Amaranthus hybridus	18.375556	-93	1894550654
Amaranthaceae	Amaranthus	Amaranthus hybridus	21.7367	-98.0983	1228325155
Amaranthaceae	Amaranthus	Amaranthus hybridus	17.2525	-94.6128	1228330275
Amaranthaceae	Amaranthus	Amaranthus hybridus	19.539722	-96.703889	1893803091
Amaranthaceae	Amaranthus	Amaranthus hybridus	18.416111	-92.357778	1894550637
Amaranthaceae	Amaranthus	Amaranthus hybridus	19.55	-96.7425	1893803094
Amaranthaceae	Amaranthus	Amaranthus hybridus	17.34	-91.292222	1894550642
Amaranthaceae	Amaranthus	Amaranthus hybridus	18.8708	-96.9964	1228249744
Amaranthaceae	Amaranthus	Amaranthus hybridus	19.93	-96.85	1228335840
Amaranthaceae	Amaranthus	Amaranthus hybridus	19.3392	-96.4903	1228157681
Amaranthaceae	Amaranthus	Amaranthus hybridus	17.93404088	-92.26410288	1894874800
Amaranthaceae	Amaranthus	Amaranthus hybridus	18.75	-97.07	1228316583
Amaranthaceae	Amaranthus	Amaranthus hybridus	18.344722	-92.578333	1893315774
Amaranthaceae	Amaranthus	Amaranthus hybridus	18.343889	-92.590278	1893315794
Amaranthaceae	Amaranthus	Amaranthus hybridus	18.10972	-92.33861	1259337163
Amaranthaceae	Amaranthus	Amaranthus hybridus	19.825	-97.058333	1893431581
Amaranthaceae	Amaranthus	Amaranthus hybridus	20.705	-97.531944	1419227024
Amaranthaceae	Amaranthus	Amaranthus hybridus	21.141667	-97.658333	1893431655
Amaranthaceae	Amaranthus	Amaranthus hybridus	18.34388	-92.59027	1259337631
Amaranthaceae	Amaranthus	Amaranthus hybridus	18.109694	-92.338694	1893814018
Amaranthaceae	Amaranthus	Amaranthus hybridus	18.212983	-92.365283	1893814021
Amaranthaceae	Amaranthus	Amaranthus hybridus	18.267944	-92.607611	1893814022
Amaranthaceae	Amaranthus	Amaranthus hybridus	18.339842	-92.97145	1893814017
Amaranthaceae	Amaranthus	Amaranthus hybridus	18.374278	-92.629472	1893814014
Amaranthaceae	Amaranthus	Amaranthus hybridus	18.357917	-92.416361	1893814016
Amaranthaceae	Amaranthus	Amaranthus hybridus	18.35445	-92.615833	1893814024
Amaranthaceae	Amaranthus	Amaranthus hybridus	18.784722	-97.195278	1419233660
Amaranthaceae	Amaranthus	Amaranthus hybridus	19.7356	-96.6717	1228227157
Amaranthaceae	Amaranthus	Amaranthus hybridus	19.275	-96.608333	1896265718
Amaranthaceae	Amaranthus	Amaranthus hybridus	19.441667	-96.691667	1896265725
Amaranthaceae	Amaranthus	Amaranthus hybridus	19.358333	-96.641667	1896265726
Amaranthaceae	Amaranthus	Amaranthus hypochondriacus	18.784722	-96.983889	1896150129
Amaranthaceae	Amaranthus	Amaranthus hypochondriacus	19.3333	-96.6667	1228300102
Amaranthaceae	Amaranthus	Amaranthus palmeri	21.66666	-97.86666	1259337967
Amaranthaceae	Amaranthus	Amaranthus palmeri	27.48666637	-99.50820544	1895392098
Amaranthaceae	Amaranthus	Amaranthus palmeri	22.225	-97.975	1896271657
Amaranthaceae	Amaranthus	Amaranthus palmeri	23.325	-99.025	1896271664
Amaranthaceae	Atriplex	Atriplex canescens	26.791667	-99.291667	1895800605
Amaranthaceae	Atriplex	Atriplex canescens	26.341667	-99.275	1895800632
Amaranthaceae	Atriplex	Atriplex canescens	24.65123721	-97.77757522	1893935730
Amaranthaceae	Atriplex	Atriplex canescens	19.79352715	-96.75542042	1895480802
Amaranthaceae	Chenopodium	Chenopodium incisum	19.400278	-96.983611	2629587971
Amaranthaceae	Chenopodium	Chenopodium incisum	19.483333	-97.25	2629666715
Amaranthaceae	Chenopodium	Chenopodium incisum	19.903889	-96.809444	2629620529
Amaranthaceae	Chenopodium	Chenopodium incisum	23.683333	-99.733333	1895520168
Amaranthaceae	Chenopodium	Chenopodium incisum	19.633	-97.15	3308606375
Amaranthaceae	Chenopodium	Chenopodium incisum	19.523456	-97.155556	1419190695
Amaranthaceae	Chenopodium	Chenopodium incisum	19.565833	-97.253611	1896051943
Amaranthaceae	Chenopodium	Chenopodium incisum	19.6	-97.1	2629553821
Amaranthaceae	Chenopodium	Chenopodium incisum	19.56062053	-97.24284725	1895520151
Amaranthaceae	Chenopodium	Chenopodium incisum	19.493889	-97.115833	1896051960
Amaranthaceae	Chenopodium	Chenopodium incisum	19.56	-97.242778	2629538686
Amaranthaceae	Dysphania	Dysphania ambrosioides	19.51	-96.941944	2629481117
Amaranthaceae	Dysphania	Dysphania ambrosioides	18.651389	-95.55	1418344799
Amaranthaceae	Dysphania	Dysphania ambrosioides	18.655556	-95.543333	2629444255
Amaranthaceae	Dysphania	Dysphania ambrosioides	17.833	-92.933	3308427650
Amaranthaceae	Dysphania	Dysphania ambrosioides	19.938889	-96.833056	1896074112
Amaranthaceae	Dysphania	Dysphania ambrosioides	19.505556	-96.864167	2629450268
Amaranthaceae	Dysphania	Dysphania ambrosioides	21.767	-97.667	3308332031
Amaranthaceae	Dysphania	Dysphania ambrosioides	19.225843	-96.320247	1893738992
Amaranthaceae	Dysphania	Dysphania ambrosioides	19.602778	-96.908333	1418343042
Amaranthaceae	Dysphania	Dysphania ambrosioides	19.533	-96.917	3307814507
Amaranthaceae	Dysphania	Dysphania ambrosioides	18.663889	-97.020833	1896074079
Amaranthaceae	Dysphania	Dysphania ambrosioides	17.997222	-92.966944	1896074068
Amaranthaceae	Dysphania	Dysphania ambrosioides	17.933333	-92.866667	2629509645
Amaranthaceae	Dysphania	Dysphania ambrosioides	19.612778	-96.939722	2629622219
Amaranthaceae	Dysphania	Dysphania ambrosioides	19.104722	-97.083333	2629451289
Amaranthaceae	Dysphania	Dysphania ambrosioides	19.575	-96.941667	1418342649
Amaranthaceae	Dysphania	Dysphania ambrosioides	23.225556	-98.423333	1896074092
Amaranthaceae	Dysphania	Dysphania ambrosioides	18.803333	-97.185	2629615298
Amaranthaceae	Dysphania	Dysphania ambrosioides	19.538059	-96.909174	1893738993
Amaranthaceae	Dysphania	Dysphania ambrosioides	19.5	-96.933	3308483793
Amaranthaceae	Dysphania	Dysphania ambrosioides	19.03333	-97.01667	3307883955
Amaranthaceae	Dysphania	Dysphania ambrosioides	18.234167	-93.138889	1421362386
Amaranthaceae	Dysphania	Dysphania ambrosioides	19.58	-96.95	1228232448
Amaranthaceae	Dysphania	Dysphania ambrosioides	20.55	-97.4667	1837911265
Amaranthaceae	Dysphania	Dysphania ambrosioides	20.55	-97.466667	2268912462
Amaranthaceae	Dysphania	Dysphania ambrosioides	21.28	-97.85	1228587206
Amaranthaceae	Dysphania	Dysphania ambrosioides	18.191111	-92.990833	1896074121
Amaranthaceae	Dysphania	Dysphania ambrosioides	18.15	-93.016667	2629448249
Amaranthaceae	Dysphania	Dysphania ambrosioides	19.16	-96.94	1259338658
Amaranthaceae	Dysphania	Dysphania ambrosioides	19.031944	-97.010555	2629670475
Amaranthaceae	Dysphania	Dysphania ambrosioides	19.023056	-96.614444	2629672619
Amaranthaceae	Dysphania	Dysphania ambrosioides	19.503056	-96.916667	1896074075
Amaranthaceae	Dysphania	Dysphania ambrosioides	18.668333	-97.038333	2629538909
Amaranthaceae	Dysphania	Dysphania ambrosioides	19.451667	-96.928611	1896074091
Amaranthaceae	Dysphania	Dysphania ambrosioides	26.08	-98.293333	1893738956
Amaranthaceae	Dysphania	Dysphania ambrosioides	25.71	-98.350833	2629498548
Amaranthaceae	Dysphania	Dysphania ambrosioides	19.431944	-96.816667	1896074090
Amaranthaceae	Dysphania	Dysphania ambrosioides	19.465	-96.846111	1896074129
Amaranthaceae	Dysphania	Dysphania ambrosioides	19.494444	-96.804722	2629667613
Amaranthaceae	Dysphania	Dysphania ambrosioides	18.9417	-96.92	1228306122
Amaranthaceae	Dysphania	Dysphania ambrosioides	18.85	-97.02	1228464740
Amaranthaceae	Dysphania	Dysphania ambrosioides	18.836389	-97.079444	2629694145
Amaranthaceae	Dysphania	Dysphania ambrosioides	21.158333	-97.691667	1893408349
Amaranthaceae	Dysphania	Dysphania ambrosioides	22.183333	-97.85	2629500634
Amaranthaceae	Dysphania	Dysphania ambrosioides	17.963056	-94.881389	2629507597
Amaranthaceae	Dysphania	Dysphania ambrosioides	18.945278	-96.877222	2629508665
Amaranthaceae	Dysphania	Dysphania ambrosioides	22.2	-97.85	2629509636
Amaranthaceae	Dysphania	Dysphania ambrosioides	18.803333	-97.180833	2629509641
Amaranthaceae	Dysphania	Dysphania ambrosioides	18.246667	-94.76	2629510636
Amaranthaceae	Dysphania	Dysphania ambrosioides	19.145	-96.112222	2629668651
Amaranthaceae	Dysphania	Dysphania ambrosioides	17.795	-94.425	2629668652
Amaranthaceae	Dysphania	Dysphania ambrosioides	20.958889	-97.403055	2629672618
Amaranthaceae	Dysphania	Dysphania ambrosioides	23.080833	-99.1825	2629742131
Amaryllidaceae	Allium	Allium glandulosum	18.5125	-95.334722	1896186050
Amaryllidaceae	Allium	Allium glandulosum	23.083333	-99.25	1895477677
Amaryllidaceae	Allium	Allium glandulosum	23.985747	-99.473872	1895477790
Amaryllidaceae	Allium	Allium glandulosum	23.220833	-98.001389	1895477801
Amaryllidaceae	Allium	Allium glandulosum	19.705556	-96.870278	1896186080
Amaryllidaceae	Allium	Allium glandulosum	23.175	-99.258333	1894239457
Amaryllidaceae	Allium	Allium glandulosum	20.404722	-97.506944	1896186069
Amaryllidaceae	Allium	Allium glandulosum	23.191667	-99.275	1894239364
Amaryllidaceae	Allium	Allium glandulosum	22.087222	-98.020278	1896186066
Amaryllidaceae	Allium	Allium longifolium	18.448889	-95.2125	2629593375
Amaryllidaceae	Allium	Allium longifolium	18.44916	-95.2125	3308136814
Amaryllidaceae	Allium	Allium longifolium	19.45397	-96.9621	1258014703
Amaryllidaceae	Allium	Allium longifolium	19.453889	-96.961944	2629602557
Amaryllidaceae	Allium	Allium longifolium	18.6	-95.083	3307878667
Amaryllidaceae	Allium	Allium longifolium	23.075	-99.241667	1894239264
Amaryllidaceae	Allium	Allium longifolium	23.066667	-99.233333	1895520027
Amaryllidaceae	Allium	Allium longifolium	23.06667	-99.23333	2807630389
Amaryllidaceae	Allium	Allium longifolium	23.067	-99.233	3308426601
Amaryllidaceae	Allium	Allium longifolium	24.625	-99.091667	1894150182
Amaryllidaceae	Allium	Allium longifolium	23.9207	-99.0573	1989311578
Amaryllidaceae	Allium	Allium longifolium	24.33077588	-98.82535141	1894148833
Anacardiaceae	Pistacia	Pistacia mexicana	19.35833	-96.725	1896260281
Anacardiaceae	Pistacia	Pistacia mexicana	18.75	-96.06	912130706
Anacardiaceae	Pistacia	Pistacia mexicana	24.52722	-98.90472	1896058807
Anacardiaceae	Pistacia	Pistacia mexicana	24.70039	-98.83539	1894781346
Anacardiaceae	Pistacia	Pistacia mexicana	22.83214	-97.83008	1893890383
Anacardiaceae	Pistacia	Pistacia mexicana	24.53667	-98.70667	1894622944
Anacardiaceae	Pistacia	Pistacia mexicana	24.71733	-98.90123	1894781240
Anacardiaceae	Pistacia	Pistacia mexicana	24.73167	-98.86167	1894623002
Anacardiaceae	Pistacia	Pistacia mexicana	19.33333	-96.69167	1896260303
Anacardiaceae	Pistacia	Pistacia mexicana	19.44167	-96.70833	1893399329
Anacardiaceae	Pistacia	Pistacia mexicana	19.58694	-96.87556	1896260242
Anacardiaceae	Pistacia	Pistacia mexicana	19.65833	-96.89167	1893399375
Anacardiaceae	Pistacia	Pistacia mexicana	24.55833	-98.69167	1894623013
Anacardiaceae	Pistacia	Pistacia mexicana	24.75039	-98.85095	1894781281
Anacardiaceae	Pistacia	Pistacia mexicana	19.55833	-96.80833	1896260276
Anacardiaceae	Pistacia	Pistacia mexicana	19.58951	-96.78533	1895456905
Anacardiaceae	Pistacia	Pistacia mexicana	24.71833	-98.90667	1894622983
Anacardiaceae	Pistacia	Pistacia mexicana	24.70028	-98.84667	1894622939
Anacardiaceae	Pistacia	Pistacia mexicana	23.7525	-98.59278	1896080540
Anacardiaceae	Pistacia	Pistacia mexicana	24.59806	-98.71875	1894622958
Anacardiaceae	Pistacia	Pistacia mexicana	24.53333	-98.76667	1895523328
Anacardiaceae	Pistacia	Pistacia mexicana	24.58511	-98.71678	1894781230
Anacardiaceae	Pistacia	Pistacia mexicana	24.71955	-98.85178	1894781283
Anacardiaceae	Pistacia	Pistacia mexicana	24.75167	-98.85517	1894623024
Anacardiaceae	Rhus	Rhus aromatica	23.15721	-99.17241	1895345153
Anacardiaceae	Rhus	Rhus aromatica	23.00083	-99.96667	1895345240
Anacardiaceae	Rhus	Rhus aromatica	23.08333	-99.25	1895345245
Anacardiaceae	Rhus	Rhus aromatica	23.42305	-99.80717	1895345232
Anacardiaceae	Rhus	Rhus aromatica	23.45	-99.26	1261042959
Anacardiaceae	Rhus	Rhus aromatica	23.09889	-99.19111	1895345179
Anacardiaceae	Rhus	Rhus aromatica	22.96667	-99.61667	1895345226
Anacardiaceae	Rhus	Rhus aromatica	23.19167	-99.325	1895800335
Anacardiaceae	Rhus	Rhus aromatica	19.3333	-96.6667	1228233919
Anacardiaceae	Rhus	Rhus microphylla	23.54167	-99.85833	1896359565
Anacardiaceae	Rhus	Rhus microphylla	23.32083	-99.68528	1896060754
Anacardiaceae	Rhus	Rhus microphylla	23.03379	-99.10429	1895458793
Anacardiaceae	Rhus	Rhus microphylla	23.55833	-99.85833	1895801538
Anacardiaceae	Rhus	Rhus pachyrrhachis	23.975	-99.45833	1895799340
Anacardiaceae	Rhus	Rhus pachyrrhachis	23.14167	-99.64167	1896213939
Anacardiaceae	Rhus	Rhus pachyrrhachis	23.28333	-99.63333	1895444373
Anacardiaceae	Rhus	Rhus pachyrrhachis	23.3	-99.6	1319420781
Anacardiaceae	Rhus	Rhus pachyrrhachis	23.25146	-99.68028	1895444334
Anacardiaceae	Rhus	Rhus pachyrrhachis	23.60411	-99.21995	1895444382
Anacardiaceae	Rhus	Rhus pachyrrhachis	23.52073	-99.65271	1895444380
Anacardiaceae	Rhus	Rhus pachyrrhachis	23.30205	-99.59141	1893428418
Anacardiaceae	Rhus	Rhus pachyrrhachis	23.05833	-99.225	1895799345
Anacardiaceae	Rhus	Rhus pachyrrhachis	23.08583	-99.70361	1896055780
Anacardiaceae	Rhus	Rhus virens	23.35	-99.53	1319120424
Anacardiaceae	Rhus	Rhus virens	23.41667	-99.01667	1895461034
Anacardiaceae	Rhus	Rhus virens	24.37917	-99.49828	1895460972
Anacardiaceae	Rhus	Rhus virens	23.58811	-99.20251	1895460942
Anacardiaceae	Rhus	Rhus virens	24.33761	-99.4914	1895461018
Anacardiaceae	Rhus	Rhus virens	23.20102	-99.6912	1893409136
Anacardiaceae	Rhus	Rhus virens	24.81967	-98.18137	1895461121
Anacardiaceae	Rhus	Rhus virens	24.57667	-98.98806	1896224936
Anacardiaceae	Rhus	Rhus virens	24.70833	-98.40833	1895801007
Anacardiaceae	Rhus	Rhus virens	24.54669	-98.77586	1894651231
Anacardiaceae	Rhus	Rhus virens	24.5525	-98.79972	1894651226
Anacardiaceae	Rhus	Rhus virens	23.69167	-98.75833	1895800935
Anacardiaceae	Rhus	Rhus virens	24.68333	-98.82528	1894651205
Anacardiaceae	Rhus	Rhus virens	23.59167	-99.24167	1895801056
Anacardiaceae	Rhus	Rhus virens	24.72528	-98.905	1894651210
Anacardiaceae	Rhus	Rhus virens	23.08278	-99.28528	1896080963
Anacardiaceae	Rhus	Rhus virens	24.725	-98.925	1894148819
Anacardiaceae	Rhus	Rhus virens	23.72056	-98.92361	1897382558
Anacardiaceae	Rhus	Rhus virens	23.54167	-99.20833	1895800270
Anacardiaceae	Rhus	Rhus virens	24.55289	-98.78484	1894782031
Anacardiaceae	Rhus	Rhus virens	24.55833	-98.95833	1894149205
Anacardiaceae	Rhus	Rhus virens	23.26909	-99.67759	1895460980
Anacardiaceae	Rhus	Rhus virens	23.71668	-98.82123	1895461001
Anacardiaceae	Rhus	Rhus virens	24.59167	-98.925	1894149239
Anacardiaceae	Rhus	Rhus virens	23.10167	-99.70083	1896080938
Anacardiaceae	Rhus	Rhus virens	24.71705	-98.91345	1895461002
Anacardiaceae	Spondias	Spondias mombin	17.675	-93.60833	1893399492
Anacardiaceae	Spondias	Spondias mombin	19.09167	-96.90833	1896270003
Anacardiaceae	Spondias	Spondias mombin	19.05833	-96.15833	1893680872
Anacardiaceae	Spondias	Spondias mombin	17.96098	-92.79273	1893824977
Anacardiaceae	Spondias	Spondias mombin	18.61984	-92.52355	1893824975
Anacardiaceae	Spondias	Spondias mombin	18.23472	-94.02361	1896063773
Anacardiaceae	Spondias	Spondias mombin	18.35958	-92.72634	1894874774
Anacardiaceae	Spondias	Spondias mombin	17.86194	-92.39528	1896063781
Anacardiaceae	Spondias	Spondias mombin	17.58861	-92.9275	1896063779
Anacardiaceae	Spondias	Spondias mombin	19.11861	-96.91778	1896063775
Anacardiaceae	Spondias	Spondias mombin	18.37306	-92.6825	1896063769
Anacardiaceae	Spondias	Spondias mombin	19.95833	-96.64167	1895053549
Anacardiaceae	Spondias	Spondias mombin	19.45	-96.87	1228310131
Anacardiaceae	Spondias	Spondias mombin	20	-96.96	912130824
Anacardiaceae	Spondias	Spondias mombin	17.835	-93.39333	1893680890
Anacardiaceae	Spondias	Spondias mombin	17.74167	-95.725	1893399645
Anacardiaceae	Spondias	Spondias mombin	18.64333	-95.09611	1258013817
Anacardiaceae	Spondias	Spondias mombin	17.2569	-94.62	1228341002
Anacardiaceae	Spondias	Spondias mombin	17.25472	-94.61667	1896270174
Anacardiaceae	Spondias	Spondias mombin	21.14167	-97.69167	1893399671
Anacardiaceae	Spondias	Spondias mombin	19.45833	-96.875	1896270150
Anacardiaceae	Spondias	Spondias mombin	19.84167	-96.99167	1893399508
Anacardiaceae	Spondias	Spondias mombin	18.14167	-94.30833	1893399590
Anacardiaceae	Spondias	Spondias mombin	17.975	-95.625	1893399548
Anacardiaceae	Spondias	Spondias mombin	17.96639	-93.565	1896270057
Anacardiaceae	Spondias	Spondias mombin	18.075	-94.26611	1896270059
Anacardiaceae	Spondias	Spondias mombin	18.45901	-95.35001	1893896155
Anacardiaceae	Spondias	Spondias mombin	18.175	-93.90833	1896270124
Anacardiaceae	Spondias	Spondias mombin	18.28656	-92.52167	1893815256
Anacardiaceae	Spondias	Spondias mombin	18.475	-95.35833	1896270132
Anacardiaceae	Spondias	Spondias mombin	18.44667	-95.25167	1896270131
Anacardiaceae	Spondias	Spondias mombin	18.39167	-95.00833	1896270075
Anacardiaceae	Spondias	Spondias mombin	18.37417	-92.78667	1896270099
Anacardiaceae	Spondias	Spondias mombin	20.08333	-96.90167	1896270097
Anacardiaceae	Spondias	Spondias mombin	19.075	-96.19167	1896270089
Anacardiaceae	Spondias	Spondias mombin	19.25	-96.68333	1896270096
Anacardiaceae	Spondias	Spondias mombin	18.46286	-95.33283	1896270105
Anacardiaceae	Spondias	Spondias mombin	18.95	-96.76667	1893306451
Anacardiaceae	Spondias	Spondias mombin	18.28666	-92.52166	1259365798
Anacardiaceae	Spondias	Spondias mombin	18.62	-96.41	1259150918
Anacardiaceae	Spondias	Spondias mombin	17.96	-93.56	1258636745
Anacardiaceae	Spondias	Spondias mombin	19.55	-96.36667	1419217625
Anacardiaceae	Spondias	Spondias mombin	18.43772	-95.06873	1895481454
Anacardiaceae	Spondias	Spondias mombin	17.26667	-94.55056	1421405123
Anacardiaceae	Spondias	Spondias mombin	17.63	-92.81	1259365357
Anacardiaceae	Spondias	Spondias mombin	17.73528	-91.64222	1421404798
Anacardiaceae	Spondias	Spondias mombin	18.4361	-95.0228	1228251718
Anacardiaceae	Spondias	Spondias mombin	18.88	-97.01	1259150881
Anacardiaceae	Spondias	Spondias mombin	18.62	-95.07194	1895652471
Anacardiaceae	Spondias	Spondias purpurea	18.15	-94.79	1259150970
Anacardiaceae	Spondias	Spondias purpurea	18.07	-94.7	1259150993
Anacardiaceae	Spondias	Spondias purpurea	19.16809	-96.71829	1895340896
Anacardiaceae	Spondias	Spondias purpurea	18.55132	-95.0613	1895340910
Anacardiaceae	Spondias	Spondias purpurea	20.375	-97.29167	1896169469
Anacardiaceae	Spondias	Spondias purpurea	18.8975	-96.87806	1896055754
Anacardiaceae	Spondias	Spondias purpurea	20.03611	-97.13278	1896055747
Anacardiaceae	Spondias	Spondias purpurea	17.93333	-94.71194	1896169457
Anacardiaceae	Tapirira	Tapirira mexicana	19.35833	-96.675	1895054425
Anacardiaceae	Tapirira	Tapirira mexicana	19.77	-96.68	1228471430
Anacardiaceae	Tapirira	Tapirira mexicana	17.29972	-91.30194	1417921346
Anacardiaceae	Tapirira	Tapirira mexicana	18.45861	-95.35139	1896065416
Anacardiaceae	Tapirira	Tapirira mexicana	18.58333	-95.11667	1896065414
Anacardiaceae	Tapirira	Tapirira mexicana	18.43667	-95.02333	1896188342
Anacardiaceae	Tapirira	Tapirira mexicana	18.61	-96.69	912130751
Anacardiaceae	Tapirira	Tapirira mexicana	19.83556	-96.79306	1896188327
Anacardiaceae	Tapirira	Tapirira mexicana	18.125	-94.30833	1893425932
Anacardiaceae	Tapirira	Tapirira mexicana	21.1	-97.88	1228541181
Anacardiaceae	Tapirira	Tapirira mexicana	19.99167	-96.70833	1893417069
Anacardiaceae	Tapirira	Tapirira mexicana	19.13	-96.9	1228194148
Anacardiaceae	Tapirira	Tapirira mexicana	18.95944	-96.80555	1897491468
Anacardiaceae	Tapirira	Tapirira mexicana	19.7242	-96.6769	1228416244
Annonaceae	Annona	Annona glabra	18.44745	-92.576867	1893814972
Annonaceae	Annona	Annona glabra	18.535083	-92.555917	1893814984
Annonaceae	Annona	Annona glabra	18.24722	-92.84833	1260614446
Annonaceae	Annona	Annona glabra	19.600278	-96.394444	1893317702
Annonaceae	Annona	Annona glabra	18.421389	-92.650556	1893317631
Annonaceae	Annona	Annona glabra	18.541511	-92.5667	1893814961
Annonaceae	Annona	Annona glabra	17.955	-94.1097	1228189042
Annonaceae	Annona	Annona glabra	18.604167	-95.083333	1895109255
Annonaceae	Annona	Annona glabra	18.42138	-92.65055	1259367033
Annonaceae	Annona	Annona glabra	18.576667	-92.447222	1894547762
Annonaceae	Annona	Annona glabra	18.245	-93.936667	1895109287
Annonaceae	Annona	Annona glabra	18.566667	-92.541111	1894547786
Annonaceae	Annona	Annona glabra	18.4475	-92.57694	1259370702
Annonaceae	Annona	Annona glabra	18.606944	-92.541667	1895109286
Annonaceae	Annona	Annona glabra	17.829167	-93.391667	1895109257
Annonaceae	Annona	Annona glabra	18.204444	-92.8525	1895109270
Annonaceae	Annona	Annona glabra	19.57	-96.415556	1895109272
Annonaceae	Annona	Annona glabra	18.511667	-95.025	1895109282
Annonaceae	Annona	Annona glabra	18.175	-92.808333	1896261295
Annonaceae	Annona	Annona glabra	19.536389	-96.735556	1896261294
Annonaceae	Annona	Annona glabra	19.575	-96.408333	1419219090
Annonaceae	Annona	Annona glabra	18.247417	-92.848342	1897334593
Annonaceae	Annona	Annona glabra	19.801667	-96.436667	1896261316
Annonaceae	Annona	Annona glabra	19.099722	-96.1125	1896261290
Annonaceae	Annona	Annona glabra	19.532778	-96.393056	1896261289
Annonaceae	Annona	Annona glabra	19.605833	-96.423611	1896261301
Annonaceae	Annona	Annona glabra	19.531667	-97.028333	1896261311
Annonaceae	Annona	Annona glabra	18.535556	-95.019167	1895109219
Annonaceae	Annona	Annona glabra	18.143333	-94.143333	1896261317
Annonaceae	Annona	Annona glabra	18.533611	-92.646389	1896261285
Annonaceae	Annona	Annona glabra	18.5675	-95.068889	1895109229
Annonaceae	Annona	Annona glabra	19.6	-96.398611	1896261326
Annonaceae	Annona	Annona glabra	19.588333	-96.390278	1896261337
Annonaceae	Annona	Annona glabra	18.000833	-94.1	1896261327
Annonaceae	Annona	Annona glabra	18.27819048	-92.64466789	1894875115
Annonaceae	Annona	Annona glabra	18.39135218	-92.61116741	1894875070
Annonaceae	Annona	Annona glabra	18.54206714	-92.56688877	1894875064
Annonaceae	Annona	Annona glabra	18.53333	-95.01666	1259369197
Annonaceae	Annona	Annona glabra	19.590278	-96.377778	1895109295
Annonaceae	Annona	Annona glabra	18.518056	-92.718611	1894875087
Annonaceae	Annona	Annona glabra	18.566667	-92.541389	1894547792
Annonaceae	Annona	Annona glabra	18.6	-92.54	1258521440
Annonaceae	Annona	Annona glabra	18.058333	-94.101389	1895109290
Annonaceae	Annona	Annona glabra	19.534722	-96.385556	1895109316
Annonaceae	Annona	Annona glabra	18.547778	-92.566667	1896075665
Annonaceae	Annona	Annona glabra	17.939444	-94.483611	1896075660
Annonaceae	Annona	Annona glabra	17.802778	-93.459722	1895109304
Annonaceae	Annona	Annona globiflora	19.3333	-96.6333	1838430934
Annonaceae	Annona	Annona globiflora	19.36	-96.636111	1896325503
Annonaceae	Annona	Annona globiflora	18.781667	-96.918333	1893642151
Annonaceae	Annona	Annona globiflora	19.250833	-96.690833	1893642156
Annonaceae	Annona	Annona globiflora	18.81	-96.718333	1893642160
Annonaceae	Annona	Annona globiflora	19.275	-96.558333	1893642161
Annonaceae	Annona	Annona globiflora	20.028333	-96.651667	1893642125
Annonaceae	Annona	Annona globiflora	18.958333	-96.825	1893642127
Annonaceae	Annona	Annona globiflora	18.375833	-95.013611	1895139693
Annonaceae	Annona	Annona globiflora	18.91	-96.775	1893642133
Annonaceae	Annona	Annona globiflora	20.446667	-97.323333	1893642142
Annonaceae	Annona	Annona globiflora	19.4	-96.73333	1259369858
Annonaceae	Annona	Annona globiflora	19.923333	-96.728056	1896325484
Annonaceae	Annona	Annona globiflora	18.791667	-96.908333	1896325483
Annonaceae	Annona	Annona globiflora	20.022778	-96.683889	1896325482
Annonaceae	Annona	Annona globiflora	19.325	-96.741667	1896325480
Annonaceae	Annona	Annona globiflora	19.408333	-96.741667	1896325479
Annonaceae	Annona	Annona globiflora	19.275	-96.741667	1896325490
Annonaceae	Annona	Annona globiflora	20.175	-96.741667	1896325502
Annonaceae	Annona	Annona globiflora	19.791667	-96.558333	1896325498
Annonaceae	Annona	Annona globiflora	19.362778	-96.764167	1896325497
Annonaceae	Annona	Annona globiflora	19.319444	-96.741667	1896325518
Annonaceae	Annona	Annona globiflora	20.027222	-96.649444	1893303588
Annonaceae	Annona	Annona globiflora	20.447778	-97.32	1896325494
Annonaceae	Annona	Annona globiflora	18.925	-96.808333	1896325508
Annonaceae	Annona	Annona globiflora	19.225278	-96.626111	1896325493
Annonaceae	Annona	Annona globiflora	18.875	-96.741667	1896325492
Annonaceae	Annona	Annona globiflora	20.441667	-97.358333	1896325520
Annonaceae	Annona	Annona globiflora	19.12	-96.48	1228226957
Annonaceae	Annona	Annona globiflora	19.25	-96.55	1419234499
Annonaceae	Annona	Annona globiflora	19.818889	-96.646667	1896325539
Annonaceae	Annona	Annona globiflora	19.382778	-96.652778	1896325504
Annonaceae	Annona	Annona globiflora	19.2675	-96.896111	1896325475
Annonaceae	Annona	Annona globiflora	19.391667	-96.791667	1896325524
Annonaceae	Annona	Annona globiflora	19.296389	-96.698611	1257766821
Annonaceae	Annona	Annona globiflora	19.530833	-96.480556	1896325472
Annonaceae	Annona	Annona globiflora	19.031667	-96.138333	1896325471
Annonaceae	Annona	Annona globiflora	18.9575	-96.7875	1896325469
Annonaceae	Annona	Annona globiflora	19.450833	-96.510278	1896325468
Annonaceae	Annona	Annona globiflora	19.2125	-96.878611	1896325473
Annonaceae	Annona	Annona globiflora	19.2375	-96.623611	1896085260
Annonaceae	Annona	Annona globiflora	19.311944	-96.703611	1896085293
Annonaceae	Annona	Annona globiflora	19.608333	-96.841667	1896325591
Annonaceae	Annona	Annona globiflora	19.481111	-96.789444	1896325571
Annonaceae	Annona	Annona globiflora	20.457778	-97.360556	1896085262
Annonaceae	Annona	Annona globiflora	19.476667	-96.793333	1896085261
Annonaceae	Annona	Annona globiflora	19.476944	-96.560833	1896085279
Annonaceae	Annona	Annona globiflora	19.4667	-96.75	1936153270
Annonaceae	Annona	Annona globiflora	19.464722	-96.839167	1896085281
Annonaceae	Annona	Annona globiflora	19.449444	-96.661389	1896085282
Annonaceae	Annona	Annona globiflora	19.416667	-96.786111	1896085285
Annonaceae	Annona	Annona globiflora	19.367778	-96.888056	1896085268
Annonaceae	Annona	Annona globiflora	19.6325	-96.874722	1896085266
Annonaceae	Annona	Annona globiflora	19.258056	-96.556667	1896085271
Annonaceae	Annona	Annona globiflora	19.32	-96.73	1228312021
Annonaceae	Annona	Annona globiflora	18.925	-96.891667	1896325590
Annonaceae	Annona	Annona globiflora	19.952778	-96.6225	1896325544
Annonaceae	Annona	Annona globiflora	19.658056	-96.610278	1896085288
Annonaceae	Annona	Annona globiflora	19.408333	-96.558333	1893401702
Annonaceae	Annona	Annona globiflora	19.45	-96.62	1228349803
Annonaceae	Annona	Annona globiflora	19.3125	-96.710278	1896325562
Annonaceae	Annona	Annona globiflora	19.375	-96.841667	1896325564
Annonaceae	Annona	Annona globiflora	19.860278	-96.613889	1896085257
Annonaceae	Annona	Annona globiflora	19.491667	-96.791667	1893401706
Annonaceae	Annona	Annona globiflora	20.258333	-97.091667	1896325601
Annonaceae	Annona	Annona globiflora	19.341667	-96.625	1896325582
Annonaceae	Annona	Annona globiflora	19.393333	-96.814444	1896085299
Annonaceae	Annona	Annona globiflora	19.375	-96.925	1896325570
Annonaceae	Annona	Annona globiflora	19.846944	-96.564722	1896085298
Annonaceae	Annona	Annona globiflora	19.5335	-96.825	1257789187
Annonaceae	Annona	Annona globiflora	19.558333	-96.691667	1896325548
Annonaceae	Annona	Annona globiflora	18.96	-96.798056	1896325551
Annonaceae	Annona	Annona globiflora	19.125	-96.491667	1896325557
Annonaceae	Annona	Annona globiflora	19.439444	-96.752778	1896325597
Annonaceae	Annona	Annona globiflora	20.455	-97.285278	1896325598
Annonaceae	Annona	Annona muricata	17.758333	-94.775	1893428585
Annonaceae	Annona	Annona muricata	19.21	-96.998333	1893700594
Annonaceae	Annona	Annona muricata	19.475	-96.558333	1419223077
Annonaceae	Annona	Annona muricata	18.541667	-96.608333	1894683087
Annonaceae	Annona	Annona muricata	18.899444	-96.8225	1896133620
Annonaceae	Annona	Annona muricata	17.998333	-93.298611	1896133622
Annonaceae	Annona	Annona muricata	19.918333	-96.936667	1896133623
Annonaceae	Annona	Annona muricata	18.325	-94.758333	1896133604
Annonaceae	Annona	Annona muricata	19.311944	-96.7	1896133607
Annonaceae	Annona	Annona muricata	19.341667	-96.775	1896133611
Annonaceae	Annona	Annona muricata	19.225278	-96.32	1896133613
Annonaceae	Annona	Annona muricata	18.891667	-96.925	1896133631
Annonaceae	Annona	Annona muricata	18.165833	-93.018056	1896133640
Annonaceae	Annona	Annona muricata	18.90106236	-96.92734263	1894683072
Annonaceae	Annona	Annona muricata	17.928056	-92.990556	1894546354
Annonaceae	Annona	Annona muricata	18.885833	-96.945833	1893307187
Annonaceae	Annona	Annona muricata	19.436667	-96.390278	1896043356
Annonaceae	Annona	Annona muricata	19.33	-96.77	1228349654
Annonaceae	Annona	Annona purpurea	19.19	-96.240833	1896047269
Annonaceae	Annona	Annona purpurea	19.054444	-96.127778	1896047264
Annonaceae	Annona	Annona purpurea	19.441667	-96.775	1893423378
Annonaceae	Annona	Annona purpurea	18.45	-95.08	1228423307
Annonaceae	Annona	Annona purpurea	18.849722	-96.863611	1419235353
Annonaceae	Annona	Annona purpurea	19.38333	-96.8	1259369223
Annonaceae	Annona	Annona purpurea	18.69	-96.73	1896244089
Annonaceae	Annona	Annona purpurea	18.846667	-96.916667	1896244109
Annonaceae	Annona	Annona purpurea	19.266667	-96.866667	1896244087
Annonaceae	Annona	Annona purpurea	19.386111	-96.847222	1896244086
Annonaceae	Annona	Annona purpurea	18.446667	-95.251667	1896244082
Annonaceae	Annona	Annona purpurea	19.146667	-96.425	1896244103
Annonaceae	Annona	Annona purpurea	19.225	-96.825	1896244107
Annonaceae	Annona	Annona purpurea	18.931667	-96.769167	1896244104
Annonaceae	Annona	Annona purpurea	18.441667	-95.275	1896244091
Annonaceae	Annona	Annona purpurea	19.301944	-96.354722	1896047272
Annonaceae	Annona	Annona purpurea	19.184722	-96.686111	1896244112
Annonaceae	Annona	Annona purpurea	19.091667	-96.141667	1419197795
Annonaceae	Annona	Annona purpurea	17.811944	-92.430278	1894552469
Annonaceae	Annona	Annona purpurea	18.794722	-96.921111	1896244114
Annonaceae	Annona	Annona rensoniana	19.141667	-96.908333	1896264804
Annonaceae	Annona	Annona rensoniana	17.455278	-93.5	1419224873
Annonaceae	Annona	Annona rensoniana	17.487222	-93.513889	1896051998
Annonaceae	Annona	Annona rensoniana	18.787222	-96.912222	1896052008
Annonaceae	Annona	Annona rensoniana	18.833611	-96.916944	1896052001
Annonaceae	Annona	Annona rensoniana	17.258889	-94.585833	1896052007
Annonaceae	Annona	Annona rensoniana	18.945	-96.803333	1896264816
Annonaceae	Annona	Annona rensoniana	18.858333	-97.025	1896264814
Annonaceae	Annona	Annona rensoniana	18.874167	-96.753889	1896264813
Annonaceae	Annona	Annona rensoniana	18.936944	-96.787778	1896264807
Annonaceae	Annona	Annona rensoniana	18.844167	-96.914444	1896264799
Annonaceae	Annona	Annona rensoniana	18.925	-96.758333	1896264796
Annonaceae	Annona	Annona rensoniana	19.2025	-96.823333	1896264795
Annonaceae	Annona	Annona rensoniana	18.540833	-95.048611	1896264792
Annonaceae	Annona	Annona rensoniana	18.65917	-96.11583	1144759928
Annonaceae	Annona	Annona rensoniana	17.243333	-94.611667	1893659903
Annonaceae	Annona	Annona rensoniana	18.88	-96.84	1421196207
Annonaceae	Annona	Annona rensoniana	17.333333	-93.6	1421358184
Annonaceae	Annona	Annona rensoniana	18.602778	-96.692222	1893659877
Annonaceae	Annona	Annona rensoniana	18.876667	-96.755	1893659881
Annonaceae	Annona	Annona rensoniana	17.525	-93.525	1893412275
Annonaceae	Annona	Annona rensoniana	18.743333	-96.783333	1893659885
Annonaceae	Annona	Annona reticulata	18.018333	-93.366389	1896072874
Annonaceae	Annona	Annona reticulata	19.38333	-96.58333	1259369448
Annonaceae	Annona	Annona reticulata	17.691944	-92.930556	1896072880
Annonaceae	Annona	Annona reticulata	17.493611	-91.449444	1894550161
Annonaceae	Annona	Annona reticulata	18.5594	-96.8503	1228600432
Annonaceae	Annona	Annona reticulata	18.401111	-95.218611	1896039310
Annonaceae	Annona	Annona reticulata	17.426389	-91.398056	1896039313
Annonaceae	Annona	Annona reticulata	19.193889	-96.866944	1896039314
Annonaceae	Annona	Annona reticulata	19.386667	-96.583889	1896039305
Annonaceae	Annona	Annona reticulata	19.357778	-96.641944	1896039320
Annonaceae	Annona	Annona reticulata	20.439056	-97.378722	1418339117
Annonaceae	Annona	Annona reticulata	17.53	-92.82	1258521336
Annonaceae	Annona	Annona reticulata	18.59	-95.05	1258724357
Annonaceae	Annona	Annona reticulata	17.4916	-92.7785	1321912033
Annonaceae	Annona	Annona reticulata	19.4	-96.85	1228571499
Annonaceae	Annona	Annona reticulata	18.691667	-95.522222	1418346697
Annonaceae	Annona	Annona reticulata	18.593889	-95.063055	1895646027
Annonaceae	Annona	Annona reticulata	18.408333	-92.357222	1894550086
Annonaceae	Annona	Annona reticulata	19.583333	-96.435	1893749528
Annonaceae	Annona	Annona reticulata	18.411111	-95.091667	1896235112
Annonaceae	Annona	Annona reticulata	19.338889	-96.761111	1896235123
Annonaceae	Annona	Annona reticulata	18.666667	-95.236667	1896235131
Annonaceae	Annona	Annona reticulata	18.436667	-95.023333	1896235136
Annonaceae	Annona	Annona reticulata	18.690833	-95.523889	1896235081
Annonaceae	Annona	Annona reticulata	19.331944	-96.761667	1896235092
Annonaceae	Annona	Annona reticulata	17.988889	-94.558611	1896235094
Annonaceae	Annona	Annona reticulata	18.339167	-94.89	1896235099
Annonaceae	Annona	Annona reticulata	17.975	-93.358333	1896235146
Annonaceae	Annona	Annona reticulata	18.419444	-95.113611	1896235153
Annonaceae	Annona	Annona reticulata	19.213056	-96.646667	1896235156
Annonaceae	Annona	Annona reticulata	19.625	-96.391667	1896235159
Annonaceae	Annona	Annona reticulata	18.193333	-92.993611	1896235160
Annonaceae	Annona	Annona reticulata	18.559444	-96.850278	1896235161
Annonaceae	Annona	Annona reticulata	19.391667	-96.591667	1896235168
Annonaceae	Annona	Annona reticulata	19.4	-96.861667	1896235169
Annonaceae	Annona	Annona reticulata	19.374722	-96.832222	1896235174
Annonaceae	Annona	Annona reticulata	19.375	-96.908333	1896235180
Annonaceae	Annona	Annona reticulata	18.448333	-95.211667	1893749287
Annonaceae	Annona	Annona squamosa	18.325	-94.7375	1418343076
Annonaceae	Annona	Annona squamosa	20.478333	-97.009444	1896050635
Annonaceae	Annona	Annona squamosa	19.541667	-96.491667	1418346890
Annonaceae	Annona	Annona squamosa	20.475	-97.008333	1896247475
Annonaceae	Annona	Annona squamosa	19.671944	-96.425556	1896247488
Annonaceae	Annona	Annona squamosa	19.75	-96.415556	1896247499
Annonaceae	Annona	Annona squamosa	20.478889	-97.011944	1893419914
Annonaceae	Annona	Annona squamosa	19.521667	-96.4975	1893692307
Annonaceae	Mosannona	Mosannona depressa	18.74333	-96.78333	1893732781
Annonaceae	Mosannona	Mosannona depressa	18.39028	-94.89861	1896318319
Annonaceae	Mosannona	Mosannona depressa	18.46389	-95.20722	1896318425
Annonaceae	Mosannona	Mosannona depressa	17.70612	-94.66741	1894692215
Annonaceae	Mosannona	Mosannona depressa	19.26667	-96.86667	1896318355
Annonaceae	Mosannona	Mosannona depressa	19.575	-96.44167	1896318374
Annonaceae	Mosannona	Mosannona depressa	18.87222	-96.73611	1896318383
Annonaceae	Mosannona	Mosannona depressa	18.46028	-95.19083	1896318354
Annonaceae	Mosannona	Mosannona depressa	18.35	-94.91028	1896318341
Annonaceae	Mosannona	Mosannona depressa	19.66	-97.01	1258524650
Annonaceae	Mosannona	Mosannona depressa	18.52	-95.18	1258524646
Annonaceae	Mosannona	Mosannona depressa	18.60722	-95.15111	1896084228
Annonaceae	Mosannona	Mosannona depressa	18.54167	-95.06028	1896084242
Annonaceae	Mosannona	Mosannona depressa	19.33	-96.63	1228557155
Annonaceae	Mosannona	Mosannona depressa	19.3	-96.7028	1228183607
Annonaceae	Mosannona	Mosannona depressa	19.33417	-96.73222	1896088548
Annonaceae	Mosannona	Mosannona depressa	19.43167	-96.69833	1896138340
Annonaceae	Mosannona	Mosannona depressa	19.45	-96.67556	1896138347
Annonaceae	Mosannona	Mosannona depressa	19.4006	-96.6508	1228512050
Annonaceae	Mosannona	Mosannona depressa	18.84417	-96.91444	1896130231
Annonaceae	Mosannona	Mosannona depressa	19.3	-96.70278	1896130230
Annonaceae	Mosannona	Mosannona depressa	19.25111	-96.41194	1896088561
Annonaceae	Mosannona	Mosannona depressa	19.31944	-96.74167	1896130224
Annonaceae	Mosannona	Mosannona depressa	19.84667	-96.56528	1896088551
Annonaceae	Mosannona	Mosannona depressa	17.2806	-94.6228	1228238799
Annonaceae	Mosannona	Mosannona depressa	19.33389	-96.45528	1896088546
Annonaceae	Mosannona	Mosannona depressa	19.26833	-96.40333	1896060445
Annonaceae	Mosannona	Mosannona depressa	19.37806	-96.6525	1896060443
Annonaceae	Mosannona	Mosannona depressa	17.28	-94.63	1258524427
Annonaceae	Mosannona	Mosannona depressa	19.66	-96.4	1258524581
Annonaceae	Mosannona	Mosannona depressa	19.33	-96.89	1258524576
Annonaceae	Mosannona	Mosannona depressa	17.25694	-94.89389	1896088544
Annonaceae	Rollinia	Rollinia mucosa	17.293056	-94.603056	1896082659
Annonaceae	Rollinia	Rollinia mucosa	17.284444	-94.503333	1896082655
Annonaceae	Rollinia	Rollinia mucosa	18.6025	-95.068611	1896082640
Annonaceae	Rollinia	Rollinia mucosa	17.588611	-92.9275	1896082645
Annonaceae	Rollinia	Rollinia mucosa	17.351389	-93.595556	1896065465
Annonaceae	Rollinia	Rollinia mucosa	17.413611	-93.621389	1896065483
Annonaceae	Rollinia	Rollinia mucosa	17.8675	-94.921389	1896158210
Annonaceae	Rollinia	Rollinia mucosa	18.5832	-95.1256	1257681960
Annonaceae	Rollinia	Rollinia mucosa	17.236111	-94.599444	1896158238
Annonaceae	Rollinia	Rollinia mucosa	17.54762	-94.499569	1896158225
Annonaceae	Rollinia	Rollinia mucosa	18.428611	-95.090556	1896158224
Annonaceae	Rollinia	Rollinia mucosa	18.424961	-94.993964	1897491499
Annonaceae	Rollinia	Rollinia mucosa	18.418686	-94.994692	1897491476
Annonaceae	Rollinia	Rollinia mucosa	17.275	-94.358333	1259372198
Annonaceae	Rollinia	Rollinia mucosa	17.277778	-94.508333	1259373556
Annonaceae	Rollinia	Rollinia mucosa	17.820833	-92.509167	1894547511
Annonaceae	Rollinia	Rollinia mucosa	17.723889	-92.428333	1894547520
Annonaceae	Rollinia	Rollinia mucosa	18.5861	-95.0522	1228548012
Annonaceae	Rollinia	Rollinia mucosa	17.266667	-94.633333	1421360442
Annonaceae	Rollinia	Rollinia mucosa	18.584722	-95.075	1258015336
Annonaceae	Rollinia	Rollinia mucosa	18.58472	-95.075	3308139672
Annonaceae	Rollinia	Rollinia mucosa	18.469294	-95.107697	2629589511
Annonaceae	Rollinia	Rollinia mucosa	18.42	-95.108	3308674379
Annonaceae	Rollinia	Rollinia mucosa	18.420278	-95.1075	2629756439
Annonaceae	Rollinia	Rollinia mucosa	18.636	-95.097	3308110553
Annonaceae	Rollinia	Rollinia mucosa	17.23564	-94.34308	3306220426
Annonaceae	Rollinia	Rollinia mucosa	19.86667	-96.77083	3308648221
Annonaceae	Rollinia	Rollinia mucosa	17.558333	-94.5775	2629746000
Annonaceae	Rollinia	Rollinia mucosa	17.367	-93.607	3308576948
Annonaceae	Rollinia	Rollinia mucosa	17.333	-93.6	3307856974
Annonaceae	Rollinia	Rollinia mucosa	19.17139	-96.13306	1584384242
Annonaceae	Rollinia	Rollinia mucosa	17.27778	-94.50833	3307944387
Annonaceae	Rollinia	Rollinia mucosa	18.428611	-95.090555	2629704925
Annonaceae	Rollinia	Rollinia mucosa	18.474278	-95.071751	2629540437
Apiaceae	Daucus	Daucus montanus	19.683889	-96.918333	1257767014
Apiaceae	Daucus	Daucus montanus	19.64166	-97.21666	1259888874
Apiaceae	Daucus	Daucus montanus	19.54188045	-96.8857897	1895387111
Apiaceae	Daucus	Daucus montanus	19.706944	-96.872222	1418339728
Apiaceae	Daucus	Daucus montanus	18.646111	-97.008611	1896273354
Apiaceae	Daucus	Daucus montanus	18.150833	-94.405	1896273335
Apiaceae	Daucus	Daucus montanus	19.588333	-97.091667	1896273347
Apiaceae	Daucus	Daucus montanus	19.69	-97.148333	1896273375
Apiaceae	Daucus	Daucus montanus	19.7025	-97.254722	1896273371
Apiaceae	Daucus	Daucus montanus	19.125	-97.041667	1896273370
Apiaceae	Daucus	Daucus montanus	19.658333	-97.125	1896273369
Apiaceae	Eryngium	Eryngium foetidum	17.43	-95.03	1259664009
Apiaceae	Eryngium	Eryngium foetidum	18.64333	-95.09722	1895648326
Apiaceae	Eryngium	Eryngium foetidum	18.64345	-95.09557	1895401001
Apiaceae	Eryngium	Eryngium foetidum	18.56667	-95.15	1259662916
Apiaceae	Eryngium	Eryngium foetidum	19.88833	-96.80556	1895400954
Apiaceae	Eryngium	Eryngium foetidum	18.7	-95.80833	1418339459
Apiaceae	Eryngium	Eryngium foetidum	18.13	-93.29333	1894551163
Apiaceae	Eryngium	Eryngium foetidum	17.52639	-92.87972	1894551141
Apiaceae	Eryngium	Eryngium foetidum	17.59778	-92.75944	1894551150
Apiaceae	Eryngium	Eryngium foetidum	17.75	-92.37972	1894551157
Apiaceae	Eryngium	Eryngium foetidum	17.95278	-92.54806	1894551127
Apiaceae	Eryngium	Eryngium foetidum	18.01197	-94.55695	1895400931
Apiaceae	Eryngium	Eryngium foetidum	18.40853	-95.1241	1895401022
Apiaceae	Eryngium	Eryngium foetidum	18.26167	-94.90861	1896113428
Apiaceae	Eryngium	Eryngium foetidum	18.89111	-96.93167	1896113425
Apiaceae	Eryngium	Eryngium foetidum	17.26667	-94.61667	1896113424
Apiaceae	Eryngium	Eryngium foetidum	17.43694	-95.03667	1896113419
Apiaceae	Eryngium	Eryngium foetidum	18.58472	-95.07389	1896113449
Apiaceae	Eryngium	Eryngium foetidum	21.65833	-98.35833	1896113441
Apiaceae	Eryngium	Eryngium foetidum	19.95806	-96.84528	1896113440
Apiaceae	Eryngium	Eryngium foetidum	18.5125	-95.31611	1896113439
Apiaceae	Eryngium	Eryngium foetidum	18.61944	-95.08889	1896113438
Apiaceae	Eryngium	Eryngium foetidum	18.59167	-95.075	1896113436
Apiaceae	Eryngium	Eryngium foetidum	20.40472	-97.50694	1896113434
Apiaceae	Eryngium	Eryngium foetidum	18.58917	-95.08806	1896113433
Apiaceae	Eryngium	Eryngium foetidum	17.98889	-94.55861	1896113431
Apiaceae	Eryngium	Eryngium foetidum	18.46167	-95.29944	1896113458
Apiaceae	Hydrocotyle	Hydrocotyle umbellata	17.98639	-94.06222	1893314592
Apiaceae	Hydrocotyle	Hydrocotyle umbellata	18.35777	-92.41611	1260876904
Apiaceae	Hydrocotyle	Hydrocotyle umbellata	18.42083	-92.64305	1260876905
Apiaceae	Hydrocotyle	Hydrocotyle umbellata	18.34389	-92.59028	1893314636
Apiaceae	Hydrocotyle	Hydrocotyle umbellata	18.33944	-92.6625	1893314702
Apiaceae	Hydrocotyle	Hydrocotyle umbellata	18.40611	-92.64667	1894078051
Apiaceae	Hydrocotyle	Hydrocotyle umbellata	20.46314	-97.60461	1893314547
Apiaceae	Hydrocotyle	Hydrocotyle umbellata	22.24833	-97.91667	1893314544
Apiaceae	Hydrocotyle	Hydrocotyle umbellata	18.64167	-95.10833	1893414633
Apiaceae	Hydrocotyle	Hydrocotyle umbellata	18.08583	-92.41055	1260876892
Apiaceae	Hydrocotyle	Hydrocotyle umbellata	18.27888	-92.63444	1260876898
Apiaceae	Hydrocotyle	Hydrocotyle umbellata	18.09	-92.39	1258832355
Apiaceae	Hydrocotyle	Hydrocotyle umbellata	18.63112	-92.49733	1893815049
Apiaceae	Hydrocotyle	Hydrocotyle umbellata	18.34375	-92.80967	1894873955
Apiaceae	Hydrocotyle	Hydrocotyle umbellata	18.25833	-92.8375	1894873926
Apiaceae	Hydrocotyle	Hydrocotyle umbellata	18.55096	-92.56022	1894873903
Apiaceae	Hydrocotyle	Hydrocotyle umbellata	18.09675	-92.3946	1893815035
Apiaceae	Hydrocotyle	Hydrocotyle umbellata	18.10833	-92.84167	1894873915
Apiaceae	Hydrocotyle	Hydrocotyle umbellata	18.31583	-92.67722	46366903
Apiaceae	Hydrocotyle	Hydrocotyle umbellata	19.21667	-96.16667	1893306682
Apiaceae	Hydrocotyle	Hydrocotyle umbellata	18.37263	-92.61245	1894873896
Apiaceae	Hydrocotyle	Hydrocotyle umbellata	18.1937	-92.34665	1893815029
Apiaceae	Hydrocotyle	Hydrocotyle umbellata	18.375	-92.86667	1895107309
Apiaceae	Hydrocotyle	Hydrocotyle umbellata	18.63611	-95.13056	1896352330
Apiaceae	Hydrocotyle	Hydrocotyle umbellata	19.55028	-96.3725	1896352339
Apiaceae	Hydrocotyle	Hydrocotyle umbellata	18.19333	-92.99472	1896352344
Apiaceae	Hydrocotyle	Hydrocotyle umbellata	19.28333	-96.44167	1895107199
Apiaceae	Hydrocotyle	Hydrocotyle umbellata	17.54167	-94.325	1896352320
Apiaceae	Hydrocotyle	Hydrocotyle umbellata	18.56028	-92.55028	1894551855
Apiaceae	Hydrocotyle	Hydrocotyle umbellata	18.69083	-95.52389	1896352278
Apiaceae	Hydrocotyle	Hydrocotyle umbellata	19.43194	-96.9475	1896352284
Apiaceae	Hydrocotyle	Hydrocotyle umbellata	19.525	-96.55833	1896352299
Apiaceae	Hydrocotyle	Hydrocotyle umbellata	19.69167	-96.84167	1896352304
Apiaceae	Hydrocotyle	Hydrocotyle umbellata	19.24167	-96.59167	1896352310
Apiaceae	Hydrocotyle	Hydrocotyle umbellata	18.39167	-93.20833	1896352313
Apiaceae	Hydrocotyle	Hydrocotyle umbellata	19.52	-96.55	1228479298
Apiaceae	Hydrocotyle	Hydrocotyle umbellata	17.98694	-92.92917	1894648169
Apiaceae	Hydrocotyle	Hydrocotyle umbellata	19.225	-96.175	1896352321
Apiaceae	Hydrocotyle	Hydrocotyle umbellata	18.26806	-92.82639	1895107156
Apiaceae	Hydrocotyle	Hydrocotyle umbellata	18.0125	-93.275	1895107161
Apiaceae	Hydrocotyle	Hydrocotyle umbellata	17.88	-93.07	1259891706
Apiaceae	Hydrocotyle	Hydrocotyle umbellata	19.21	-96.59167	1893670256
Apiaceae	Hydrocotyle	Hydrocotyle umbellata	25.885	-98.51611	1895107228
Apiaceae	Hydrocotyle	Hydrocotyle umbellata	18.22416	-92.83694	1259889937
Apiaceae	Hydrocotyle	Hydrocotyle umbellata	19.26667	-96.25	1895107213
Apiaceae	Hydrocotyle	Hydrocotyle umbellata	18.30958	-92.67315	1893815039
Apiaceae	Hydrocotyle	Hydrocotyle umbellata	19.71722	-96.85111	1895107217
Apiaceae	Hydrocotyle	Hydrocotyle umbellata	18.19444	-92.99167	1895107243
Apiaceae	Hydrocotyle	Hydrocotyle umbellata	18.11611	-92.525	1893815041
Apiaceae	Hydrocotyle	Hydrocotyle umbellata	18.20833	-93.06944	1895107267
Apiaceae	Hydrocotyle	Hydrocotyle umbellata	19.42833	-96.94333	1893670259
Apiaceae	Hydrocotyle	Hydrocotyle umbellata	18.40611	-92.64666	1259890760
Apiaceae	Hydrocotyle	Hydrocotyle umbellata	17.78389	-91.55028	1895107205
Apocynaceae	Gonolobus	Gonolobus barbatus	19.72	-96.4	1258497333
Apocynaceae	Gonolobus	Gonolobus barbatus	19.53333	-96.38333	1895943506
Apocynaceae	Gonolobus	Gonolobus barbatus	19.72667	-96.42278	1895943508
Apocynaceae	Gonolobus	Gonolobus barbatus	19.31389	-96.30806	1895943438
Apocynaceae	Gonolobus	Gonolobus barbatus	19.19	-96.13	1259097066
Apocynaceae	Gonolobus	Gonolobus barbatus	19.59944	-96.39139	1895943527
Apocynaceae	Gonolobus	Gonolobus barbatus	19.34444	-96.47361	1895943526
Apocynaceae	Gonolobus	Gonolobus barbatus	19.31333	-96.30028	1895644945
Apocynaceae	Gonolobus	Gonolobus barbatus	19.33	-96.49	1258497269
Apocynaceae	Gonolobus	Gonolobus barbatus	19.58	-96.83	1258497842
Apocynaceae	Gonolobus	Gonolobus barbatus	19.53	-96.38	1258497849
Apocynaceae	Gonolobus	Gonolobus barbatus	17.98611	-92.82611	1895133109
Apocynaceae	Gonolobus	Gonolobus barbatus	19.11	-96.11	1258497234
Apocynaceae	Gonolobus	Gonolobus barbatus	19.72222	-96.40694	1896350330
Apocynaceae	Gonolobus	Gonolobus barbatus	19.34056	-96.5025	1893709640
Apocynaceae	Gonolobus	Gonolobus barbatus	19.31278	-96.3	1897348297
Apocynaceae	Gonolobus	Gonolobus niger	20.72194	-97.20333	1895943642
Apocynaceae	Gonolobus	Gonolobus niger	20.09833	-97.08722	1895943688
Apocynaceae	Gonolobus	Gonolobus niger	20.02722	-96.64944	1893304417
Apocynaceae	Gonolobus	Gonolobus niger	19.85889	-96.54306	1895943691
Apocynaceae	Gonolobus	Gonolobus niger	21.28333	-97.85	1895943628
Apocynaceae	Gonolobus	Gonolobus niger	19.54111	-96.39417	1895943662
Apocynaceae	Gonolobus	Gonolobus niger	19.21583	-96.94444	1895943588
Apocynaceae	Gonolobus	Gonolobus niger	18.83139	-96.80056	1895943683
Apocynaceae	Gonolobus	Gonolobus niger	19.66861	-96.40722	1895943668
Apocynaceae	Gonolobus	Gonolobus niger	18.80972	-96.65583	1895943622
Apocynaceae	Gonolobus	Gonolobus niger	20.04917	-97.09083	1895943664
Apocynaceae	Gonolobus	Gonolobus niger	19.18333	-96.3	1895943650
Apocynaceae	Gonolobus	Gonolobus niger	19.32194	-96.31861	1896185614
Apocynaceae	Gonolobus	Gonolobus niger	23.12	-99.11	1258663287
Apocynaceae	Gonolobus	Gonolobus niger	20.42	-97.38	1258663288
Apocynaceae	Gonolobus	Gonolobus niger	19.66833	-96.41472	1896185637
Apocynaceae	Gonolobus	Gonolobus niger	20.04	-97.09	1258663306
Apocynaceae	Gonolobus	Gonolobus niger	18.18	-94.88	1258663328
Apocynaceae	Gonolobus	Gonolobus niger	19.31	-96.31	1258663351
Apocynaceae	Gonolobus	Gonolobus niger	19.18	-96.3	1258663369
Apocynaceae	Gonolobus	Gonolobus niger	19.65	-96.41	1258663243
Apocynaceae	Gonolobus	Gonolobus niger	18.925	-96.80833	1896185610
Apocynaceae	Gonolobus	Gonolobus niger	23.225	-98.15833	1895797863
Apocynaceae	Gonolobus	Gonolobus niger	20.20833	-96.875	1896185609
Apocynaceae	Gonolobus	Gonolobus niger	19.66167	-97.13056	1896185605
Apocynaceae	Gonolobus	Gonolobus niger	18.83	-96.79	1258663233
Apocynaceae	Gonolobus	Gonolobus niger	22.56	-99.03	1261132342
Apocynaceae	Gonolobus	Gonolobus niger	23.04	-99.15	1258663413
Apocynaceae	Gonolobus	Gonolobus niger	19.84778	-96.56667	1419231031
Apocynaceae	Gonolobus	Gonolobus niger	21.525	-98.275	1893420132
Apocynaceae	Gonolobus	Gonolobus niger	23.21666	-98.15833	1259215656
Apocynaceae	Gonolobus	Gonolobus niger	18.61194	-95.65639	1895943695
Apocynaceae	Gonolobus	Gonolobus niger	19.2	-96.82	1258919257
Apocynaceae	Gonolobus	Gonolobus niger	18.91667	-96.8	1895943697
Apocynaceae	Gonolobus	Gonolobus niger	23.21667	-98.15833	1895943715
Apocynaceae	Gonolobus	Gonolobus niger	19.97944	-96.69139	1895943701
Apocynaceae	Gonolobus	Gonolobus niger	18.14861	-94.80806	1895943709
Apocynaceae	Gonolobus	Gonolobus niger	18.81	-96.65	1258919394
Apocynaceae	Marsdenia	Marsdenia coulteri	19.38639	-96.64972	1895943033
Apocynaceae	Marsdenia	Marsdenia coulteri	23.62816	-98.96646	1895420435
Apocynaceae	Marsdenia	Marsdenia coulteri	24.02806	-97.94611	1895943029
Apocynaceae	Marsdenia	Marsdenia coulteri	22.94722	-99.19556	1895943045
Apocynaceae	Marsdenia	Marsdenia coulteri	22.085	-98.21333	1895943042
Apocynaceae	Marsdenia	Marsdenia coulteri	25.87648	-97.52023	1895420460
Apocynaceae	Marsdenia	Marsdenia coulteri	19.57111	-96.79	1893803511
Apocynaceae	Marsdenia	Marsdenia coulteri	19.67667	-96.39417	1893803475
Apocynaceae	Marsdenia	Marsdenia coulteri	24.07326	-99.04584	1895420448
Apocynaceae	Marsdenia	Marsdenia coulteri	22.19167	-98.30417	1895943083
Apocynaceae	Marsdenia	Marsdenia coulteri	21.83	-98.05	1228153192
Apocynaceae	Marsdenia	Marsdenia coulteri	19.31666	-96.68333	1259650701
Apocynaceae	Marsdenia	Marsdenia coulteri	22.12556	-97.80972	1895943086
Apocynaceae	Marsdenia	Marsdenia coulteri	21.20833	-97.925	1896301853
Apocynaceae	Marsdenia	Marsdenia coulteri	24.03472	-98.69722	1895943069
Apocynaceae	Marsdenia	Marsdenia coulteri	22.05833	-98.20833	1896301836
Apocynaceae	Marsdenia	Marsdenia coulteri	24.26556	-98.44778	1896301835
Apocynaceae	Marsdenia	Marsdenia coulteri	19.46083	-96.74806	1896301828
Apocynaceae	Marsdenia	Marsdenia coulteri	19.61722	-96.73222	1896301845
Apocynaceae	Marsdenia	Marsdenia coulteri	19.325	-96.69167	1896301847
Apocynaceae	Marsdenia	Marsdenia coulteri	19.31667	-96.68333	1895943073
Apocynaceae	Marsdenia	Marsdenia coulteri	23.63417	-99.26833	1895943084
Apocynaceae	Marsdenia	Marsdenia coulteri	24.69167	-99.04167	1896301850
Apocynaceae	Marsdenia	Marsdenia coulteri	21.2	-97.92	1228151781
Apocynaceae	Marsdenia	Marsdenia coulteri	24.68333	-99.03333	1895943065
Apocynaceae	Marsdenia	Marsdenia coulteri	24.68167	-98.27889	1895943068
Apocynaceae	Marsdenia	Marsdenia coulteri	22.05	-98.2	1895943062
Apocynaceae	Marsdenia	Marsdenia coulteri	19.54278	-96.74361	1895943057
Apocynaceae	Marsdenia	Marsdenia coulteri	19.31417	-96.69778	1895943054
Apocynaceae	Marsdenia	Marsdenia coulteri	19.17111	-96.70528	1896301872
Apocynaceae	Marsdenia	Marsdenia coulteri	19.39833	-96.65333	1893719929
Apocynaceae	Marsdenia	Marsdenia coulteri	19.025	-96.14167	1896301879
Apocynaceae	Marsdenia	Marsdenia coulteri	19.49167	-96.79167	1893429768
Apocynaceae	Marsdenia	Marsdenia coulteri	24.5077	-99.01063	1895420388
Apocynaceae	Marsdenia	Marsdenia coulteri	19.09667	-96.10778	1893719923
Apocynaceae	Marsdenia	Marsdenia coulteri	19.325	-96.50833	1896301883
Apocynaceae	Marsdenia	Marsdenia coulteri	23.58528	-99.2	1895943064
Apocynaceae	Marsdenia	Marsdenia coulteri	22.16	-98.31	1258598482
Apocynaceae	Marsdenia	Marsdenia coulteri	22.91944	-98.14028	1895943183
Apocynaceae	Marsdenia	Marsdenia coulteri	24.43083	-99.02583	1895942877
Apocynaceae	Marsdenia	Marsdenia coulteri	19.31666	-96.73333	1259215297
Apocynaceae	Marsdenia	Marsdenia coulteri	23.46	-98.97	1258164738
Apocynaceae	Marsdenia	Marsdenia coulteri	19.41	-96.65	1258601114
Apocynaceae	Marsdenia	Marsdenia coulteri	19.91	-96.66	1258601095
Apocynaceae	Marsdenia	Marsdenia coulteri	22.80972	-99.38639	1895943123
Apocynaceae	Marsdenia	Marsdenia coulteri	22.03333	-98.38333	1895943127
Apocynaceae	Marsdenia	Marsdenia coulteri	18.46	-95.16	1258601071
Apocynaceae	Marsdenia	Marsdenia coulteri	19.51	-96.48	1258601077
Apocynaceae	Marsdenia	Marsdenia coulteri	21.66	-97.7	1258601078
Apocynaceae	Marsdenia	Marsdenia coulteri	21.2	-97.91	1258601083
Apocynaceae	Marsdenia	Marsdenia coulteri	22.03	-98.18	1258601089
Apocynaceae	Marsdenia	Marsdenia coulteri	20.44	-97.32	1258601098
Apocynaceae	Marsdenia	Marsdenia coulteri	18.4606	-95.1897	1228507838
Apocynaceae	Marsdenia	Marsdenia coulteri	22.25	-98.15	1895942945
Apocynaceae	Marsdenia	Marsdenia coulteri	19.01	-96.13	1258601090
Apocynaceae	Marsdenia	Marsdenia coulteri	22.03333	-98.18333	1895943139
Apocynaceae	Marsdenia	Marsdenia coulteri	19.21	-96.58	1258601092
Apocynaceae	Marsdenia	Marsdenia coulteri	24.725	-98.25833	1895799957
Apocynaceae	Marsdenia	Marsdenia coulteri	24.64167	-99.00833	1894149604
Apocynaceae	Marsdenia	Marsdenia coulteri	24.075	-97.94167	1895799929
Apocynaceae	Marsdenia	Marsdenia coulteri	24.10833	-98.75833	1895799996
Apocynaceae	Marsdenia	Marsdenia coulteri	22.32	-98.4	1228402454
Apocynaceae	Marsdenia	Marsdenia coulteri	20.72	-97.52	1258408978
Apocynaceae	Marsdenia	Marsdenia coulteri	24.10833	-98.79167	1895799974
Apocynaceae	Marsdenia	Marsdenia coulteri	24.02	-99.26	1258164431
Apocynaceae	Marsdenia	Marsdenia coulteri	24.62722	-99.0025	1895420253
Apocynaceae	Marsdenia	Marsdenia coulteri	18.46	-95.18	1258601061
Apocynaceae	Marsdenia	Marsdenia coulteri	19.25278	-96.26417	1895942999
Apocynaceae	Marsdenia	Marsdenia coulteri	23.7675	-98.20778	1895943000
Apocynaceae	Marsdenia	Marsdenia coulteri	23.60694	-98.61528	1895942993
Apocynaceae	Marsdenia	Marsdenia coulteri	18.36667	-95.16667	1895942991
Apocynaceae	Marsdenia	Marsdenia coulteri	19.18	-96.71	1258601051
Apocynaceae	Marsdenia	Marsdenia coulteri	23.60556	-99.305	1895942985
Apocynaceae	Marsdenia	Marsdenia coulteri	21.2	-97.91667	1895943021
Apocynaceae	Marsdenia	Marsdenia coulteri	22.575	-99.04167	1897343109
Apocynaceae	Marsdenia	Marsdenia coulteri	19.01667	-96.13333	1895943093
Apocynaceae	Marsdenia	Marsdenia coulteri	22.77222	-98.57861	1895943016
Apocynaceae	Marsdenia	Marsdenia coulteri	19.32	-96.48	1228600833
Apocynaceae	Marsdenia	Marsdenia coulteri	23.63917	-99.19306	1895943010
Apocynaceae	Marsdenia	Marsdenia coulteri	18.85	-96.71	1258600991
Apocynaceae	Marsdenia	Marsdenia coulteri	22.74333	-99.6675	1895942971
Apocynaceae	Marsdenia	Marsdenia coulteri	19.91667	-96.66667	1895942969
Apocynaceae	Marsdenia	Marsdenia coulteri	18.38	-95.19	1258598489
Apocynaceae	Marsdenia	Marsdenia coulteri	21.63333	-97.83333	1895942972
Apocynaceae	Marsdenia	Marsdenia coulteri	22.12	-97.81	1258598495
Apocynaceae	Marsdenia	Marsdenia coulteri	19.39	-96.63	1258598498
Apocynaceae	Marsdenia	Marsdenia coulteri	19.31	-96.48	1258601006
Apocynaceae	Marsdenia	Marsdenia coulteri	24.01	-98.76	1258598725
Apocynaceae	Marsdenia	Marsdenia coulteri	19.38	-96.58	1258217012
Apocynaceae	Marsdenia	Marsdenia macrophylla	18.51833	-95.03583	1894010301
Apocynaceae	Marsdenia	Marsdenia macrophylla	19.8333	-96.8167	1717043026
Apocynaceae	Marsdenia	Marsdenia macrophylla	23.74167	-99.10833	1895797977
Apocynaceae	Marsdenia	Marsdenia macrophylla	18.51667	-95.15	1421403801
Apocynaceae	Marsdenia	Marsdenia macrophylla	23.85833	-99.39167	1895797968
Apocynaceae	Marsdenia	Marsdenia macrophylla	18.55722	-95.20028	1846527318
Apocynaceae	Marsdenia	Marsdenia macrophylla	23.14167	-98.40833	1895797962
Apocynaceae	Marsdenia	Marsdenia macrophylla	23.09167	-98.34167	1895797958
Apocynaceae	Plumeria	Plumeria rubra	19.55556	-96.76806	1895340417
Apocynaceae	Plumeria	Plumeria rubra	18.89298	-97.04199	474844723
Apocynaceae	Plumeria	Plumeria rubra	18.3	-94.8917	1228299785
Apocynaceae	Plumeria	Plumeria rubra	19.23556	-96.61194	1896079782
Apocynaceae	Plumeria	Plumeria rubra	18.42131	-95.11398	1846526929
Apocynaceae	Plumeria	Plumeria rubra	18.52	-95.15	1228452361
Apocynaceae	Plumeria	Plumeria rubra	19.09167	-96.925	1896135669
Apocynaceae	Plumeria	Plumeria rubra	19.6108	-96.9153	1228510388
Apocynaceae	Plumeria	Plumeria rubra	19.41889	-97.00667	1896075325
Apocynaceae	Plumeria	Plumeria rubra	19.65333	-96.81333	1896075327
Apocynaceae	Plumeria	Plumeria rubra	19.42222	-96.97583	1896135602
Apocynaceae	Plumeria	Plumeria rubra	18.42472	-95.09583	1896327263
Apocynaceae	Plumeria	Plumeria rubra	18.735	-96.7917	1228511018
Apocynaceae	Plumeria	Plumeria rubra	19.74306	-96.4175	1896135615
Apocynaceae	Plumeria	Plumeria rubra	19.59	-96.81639	1896135660
Apocynaceae	Tabernaemontana	Tabernaemontana alba	20.975	-97.40833	1896119063
Apocynaceae	Tabernaemontana	Tabernaemontana alba	19.225	-96.20833	1896119053
Apocynaceae	Tabernaemontana	Tabernaemontana alba	21.79167	-98.15833	1896120362
Apocynaceae	Tabernaemontana	Tabernaemontana alba	18.07972	-94.61806	1896120357
Apocynaceae	Tabernaemontana	Tabernaemontana alba	18.34734	-94.85852	1895501955
Apocynaceae	Tabernaemontana	Tabernaemontana alba	18.5836	-95.0664	1228430992
Apocynaceae	Tabernaemontana	Tabernaemontana alba	22.8573	-99.12488	1895501967
Apocynaceae	Tabernaemontana	Tabernaemontana alba	18.23333	-93.42083	1259256827
Apocynaceae	Tabernaemontana	Tabernaemontana alba	21.2125	-97.82306	1421398217
Apocynaceae	Tabernaemontana	Tabernaemontana alba	17.84167	-93.50833	1893408813
Apocynaceae	Tabernaemontana	Tabernaemontana alba	18.54	-95.21	1895501917
Apocynaceae	Tabernaemontana	Tabernaemontana alba	18.25722	-92.2675	1421383471
Apocynaceae	Tabernaemontana	Tabernaemontana alba	18.35833	-95.125	1893408841
Apocynaceae	Tabernaemontana	Tabernaemontana alba	17.82222	-93.55028	1259259489
Apocynaceae	Tabernaemontana	Tabernaemontana alba	18.12	-92.84972	1259259614
Apocynaceae	Tabernaemontana	Tabernaemontana alba	17.62611	-95.74361	1421392231
Apocynaceae	Tabernaemontana	Tabernaemontana alba	17.60333	-92.93722	1896079683
Apocynaceae	Tabernaemontana	Tabernaemontana alba	18.23083	-92.78111	1896079687
Apocynaceae	Tabernaemontana	Tabernaemontana alba	17.73278	-93.59917	1896079688
Apocynaceae	Tabernaemontana	Tabernaemontana alba	18.64889	-95.13972	1896079690
Apocynaceae	Tabernaemontana	Tabernaemontana alba	18.36666	-96.13333	1259259837
Apocynaceae	Tabernaemontana	Tabernaemontana alba	18.44222	-95.07333	1896118879
Apocynaceae	Tabernaemontana	Tabernaemontana alba	19.77	-96.42	1228329389
Apocynaceae	Tabernaemontana	Tabernaemontana alba	18.38	-95.08	1228417448
Apocynaceae	Tabernaemontana	Tabernaemontana alba	18.04166	-93.20833	1259895925
Apocynaceae	Tabernaemontana	Tabernaemontana alba	18.61583	-95.06139	1896079676
Apocynaceae	Tabernaemontana	Tabernaemontana alba	17.69611	-92.94833	1896079677
Apocynaceae	Tabernaemontana	Tabernaemontana alba	17.87139	-93.54528	1896079674
Apocynaceae	Tabernaemontana	Tabernaemontana alba	17.92111	-93.54194	1896079669
Apocynaceae	Tabernaemontana	Tabernaemontana alba	18.45306	-95.06194	1896118977
Apocynaceae	Tabernaemontana	Tabernaemontana alba	19.48472	-96.575	1896118963
Apocynaceae	Tabernaemontana	Tabernaemontana alba	17.275	-94.54167	1896118988
Apocynaceae	Tabernaemontana	Tabernaemontana alba	17.66639	-91.06222	1259260218
Apocynaceae	Tabernaemontana	Tabernaemontana alba	18.1	-94.33694	1257769029
Apocynaceae	Tabernaemontana	Tabernaemontana alba	18.09028	-94.38722	1257769038
Apocynaceae	Tabernaemontana	Tabernaemontana alba	17.965	-94.72	1896119022
Apocynaceae	Tabernaemontana	Tabernaemontana alba	18.1175	-94.37556	1257769272
Apocynaceae	Tabernaemontana	Tabernaemontana alba	20.31833	-97.27139	1896119032
Apocynaceae	Tabernaemontana	Tabernaemontana alba	20.25833	-97.275	1896119021
Apocynaceae	Tabernaemontana	Tabernaemontana alba	17.66056	-95.735	1896119002
Apocynaceae	Tabernaemontana	Tabernaemontana alba	19.48861	-96.81444	1896119011
Apocynaceae	Tabernaemontana	Tabernaemontana alba	18	-93.58333	1896118899
Apocynaceae	Tabernaemontana	Tabernaemontana alba	18.5408	-95.0486	1228344226
Apocynaceae	Tabernaemontana	Tabernaemontana alba	19.39667	-96.78833	1896118947
Apocynaceae	Tabernaemontana	Tabernaemontana alba	19.51528	-96.50444	1896118939
Apocynaceae	Tabernaemontana	Tabernaemontana alba	18.28306	-94.71083	1896118932
Apocynaceae	Tabernaemontana	Tabernaemontana alba	18.455	-94.97333	1896118935
Apocynaceae	Tabernaemontana	Tabernaemontana alba	18.45417	-95.24194	1896048094
Apocynaceae	Tabernaemontana	Tabernaemontana alba	20.38222	-97.35167	1896137690
Apocynaceae	Tabernaemontana	Tabernaemontana alba	18.20833	-93.90833	1896137687
Apocynaceae	Tabernaemontana	Tabernaemontana alba	20.72083	-97.20333	1895502061
Apocynaceae	Tabernaemontana	Tabernaemontana alba	19.59	-96.3811	1228383574
Apocynaceae	Tabernaemontana	Tabernaemontana alba	18.06361	-92.88361	1896048096
Apocynaceae	Tabernaemontana	Tabernaemontana alba	17.865	-93.46417	1896048123
Apocynaceae	Tabernaemontana	Tabernaemontana alba	17.77833	-91.53111	1896048129
Apocynaceae	Tabernaemontana	Tabernaemontana alba	19.41667	-96.78611	1896048128
Apocynaceae	Tabernaemontana	Tabernaemontana alba	23.13361	-99.14278	1896048124
Apocynaceae	Tabernaemontana	Tabernaemontana alba	17.71333	-93.61472	1896048121
Apocynaceae	Tabernaemontana	Tabernaemontana alba	20.44667	-97.36333	1418342137
Apocynaceae	Tabernaemontana	Tabernaemontana alba	18.04167	-93.20833	1897329650
Apocynaceae	Tabernaemontana	Tabernaemontana alba	18.16639	-92.96861	1896048130
Apocynaceae	Tabernaemontana	Tabernaemontana alba	17.58306	-92.87389	1896048131
Apocynaceae	Tabernaemontana	Tabernaemontana alba	18.02722	-93.39889	1896048108
Apocynaceae	Tabernaemontana	Tabernaemontana alba	19.58833	-96.38778	1896048144
Apocynaceae	Tabernaemontana	Tabernaemontana alba	17.65194	-93.38389	1895502055
Apocynaceae	Tabernaemontana	Tabernaemontana alba	18.2675	-92.25722	1894549681
Apocynaceae	Tabernaemontana	Tabernaemontana alba	20.48029	-97.01006	1895502017
Apocynaceae	Tabernaemontana	Tabernaemontana alba	18.37486	-92.78662	1894875387
Apocynaceae	Tabernaemontana	Tabernaemontana alba	19.38	-96.8417	1228383274
Apocynaceae	Tabernaemontana	Tabernaemontana alba	18.275	-96.14167	1893408934
Apocynaceae	Tabernaemontana	Tabernaemontana alba	17.45833	-91.525	1893409222
Apocynaceae	Tabernaemontana	Tabernaemontana alba	18.45794	-95.18769	1895502007
Apocynaceae	Tabernaemontana	Tabernaemontana alba	19.50062	-96.96672	1893895964
Apocynaceae	Tabernaemontana	Tabernaemontana alba	19.84167	-96.975	1893408908
Apocynaceae	Tabernaemontana	Tabernaemontana alba	18.15833	-94.275	1893409244
Apocynaceae	Tabernaemontana	Tabernaemontana alba	17.26667	-94.50833	1895502016
Apocynaceae	Tabernaemontana	Tabernaemontana alba	20.955	-97.40667	1893610652
Apocynaceae	Tabernaemontana	Tabernaemontana alba	23.05972	-99.19861	1895502008
Apocynaceae	Tabernaemontana	Tabernaemontana alba	18.10703	-94.35808	1258008619
Apocynaceae	Tabernaemontana	Tabernaemontana alba	18.45	-95.05	1259256230
Apocynaceae	Tabernaemontana	Tabernaemontana alba	18.2667	-95.9	1703340468
Apocynaceae	Tabernaemontana	Tabernaemontana alba	19.53216	-96.38774	1893610864
Apocynaceae	Tabernaemontana	Tabernaemontana alba	19.21667	-96.76667	1895502042
Apocynaceae	Tabernaemontana	Tabernaemontana alba	18.2833	-94.7	1703340443
Apocynaceae	Tabernaemontana	Tabernaemontana alba	20.4333	-97.35	1703340440
Apocynaceae	Tabernaemontana	Tabernaemontana alba	18.45	-95.0583	1703340465
Apocynaceae	Tabernaemontana	Tabernaemontana alba	18.6333	-95.65	1703340464
Apocynaceae	Tabernaemontana	Tabernaemontana alba	18.45	-95.3167	1703340461
Apocynaceae	Tabernaemontana	Tabernaemontana litoralis	18.546082	-95.219639	2269021919
Apocynaceae	Tabernaemontana	Tabernaemontana litoralis	19.464167	-97.004167	2629767631
Apocynaceae	Tabernaemontana	Tabernaemontana litoralis	18.423333	-95.019167	2629769435
Apocynaceae	Tabernaemontana	Tabernaemontana litoralis	18.424	-95.019	3308110965
Apocynaceae	Tabernaemontana	Tabernaemontana litoralis	18.475556	-95.070278	2629751557
Apocynaceae	Tabernaemontana	Tabernaemontana litoralis	18.47554	-95.07046	3308094676
Apocynaceae	Tabernaemontana	Tabernaemontana litoralis	18.5225	-95.153333	1257764541
Apocynaceae	Tabernaemontana	Tabernaemontana litoralis	18.5783	-95.1343	1257681904
Apocynaceae	Tabernaemontana	Tabernaemontana litoralis	18.5375	-95.063889	2629482551
Apocynaceae	Tabernaemontana	Tabernaemontana litoralis	19.783	-96.9	3308025704
Apocynaceae	Tabernaemontana	Tabernaemontana litoralis	18.113893	-94.351676	1893685013
Apocynaceae	Tabernaemontana	Tabernaemontana litoralis	18.113889	-94.351667	2629742490
Apocynaceae	Tabernaemontana	Tabernaemontana litoralis	19.956667	-96.797778	2629511936
Apocynaceae	Tabernaemontana	Tabernaemontana litoralis	19.333542	-96.485314	2629757529
Apocynaceae	Tabernaemontana	Tabernaemontana litoralis	17.2	-94.641667	1895436301
Apocynaceae	Tabernaemontana	Tabernaemontana litoralis	17.2	-94.64167	2807461016
Apocynaceae	Tabernaemontana	Tabernaemontana litoralis	19.403011	-96.986561	1895415961
Apocynaceae	Tabernaemontana	Tabernaemontana litoralis	18.35	-94.844444	2629451218
Apocynaceae	Tabernaemontana	Tabernaemontana litoralis	19.4333	-97.0333	1703340459
Apocynaceae	Tabernaemontana	Tabernaemontana litoralis	19.43	-97.03	2464686164
Apocynaceae	Tabernaemontana	Tabernaemontana litoralis	19.41	-97.1258	1228433866
Apocynaceae	Tabernaemontana	Tabernaemontana litoralis	18.32	-94.94	1895415851
Apocynaceae	Tabernaemontana	Tabernaemontana litoralis	18.38	-94.9	1228450758
Apocynaceae	Tabernaemontana	Tabernaemontana litoralis	19.93	-96.57	1228232075
Apocynaceae	Tabernaemontana	Tabernaemontana litoralis	19.933333	-96.566667	2629551552
Apocynaceae	Tabernaemontana	Tabernaemontana litoralis	17.30639	-94.58917	3308122654
Apocynaceae	Tabernaemontana	Tabernaemontana litoralis	19.42	-97	1228585555
Apocynaceae	Tabernaemontana	Tabernaemontana litoralis	19.45	-97.017	3308284984
Apocynaceae	Tabernaemontana	Tabernaemontana litoralis	17.959722	-94.111944	2629544821
Apocynaceae	Tabernaemontana	Tabernaemontana litoralis	18.502649	-95.034979	2629538953
Apocynaceae	Tabernaemontana	Tabernaemontana litoralis	18.441225	-95.046549	2629546565
Apocynaceae	Tabernaemontana	Tabernaemontana litoralis	18.45	-95.017	3307681263
Apocynaceae	Tabernaemontana	Tabernaemontana litoralis	18.583333	-95.15	2629542317
Apocynaceae	Tabernaemontana	Tabernaemontana litoralis	19.38	-96.88	1258335708
Apocynaceae	Vallesia	Vallesia glabra	24.28333	-98.46667	1895493326
Apocynaceae	Vallesia	Vallesia glabra	23.55	-99.31667	1895493345
Apocynaceae	Vallesia	Vallesia glabra	23.575	-99.425	1895798440
Apocynaceae	Vallesia	Vallesia glabra	23.325	-99.19167	1895798436
Apocynaceae	Vallesia	Vallesia glabra	23.52933	-99.34	1895493309
Apocynaceae	Vallesia	Vallesia glabra	24.21485	-98.48344	1895493312
Araceae	Anthurium	Anthurium scandens	19.47	-96.95	1258918907
Araceae	Anthurium	Anthurium scandens	19.05	-96.868333	1893717675
Araceae	Anthurium	Anthurium scandens	17.683333	-92.816667	1421405598
Araceae	Anthurium	Anthurium scandens	17.2	-94.583333	1421405884
Araceae	Anthurium	Anthurium scandens	17.5925	-92.825556	1421410905
Araceae	Anthurium	Anthurium scandens	17.25	-94.616667	1421402968
Araceae	Anthurium	Anthurium scandens	17.733333	-92.6	1421417007
Araceae	Anthurium	Anthurium scandens	19.211667	-96.851111	1894469807
Araceae	Anthurium	Anthurium scandens	17.441667	-92.775	1894469821
Araceae	Anthurium	Anthurium scandens	18.55	-95.21666	1260240664
Araceae	Anthurium	Anthurium scandens	19.367222	-97	1894469847
Araceae	Anthurium	Anthurium scandens	18.310833	-94.974167	1897358351
Araceae	Anthurium	Anthurium scandens	17.248056	-94.586111	1893717664
Araceae	Anthurium	Anthurium scandens	19.383333	-96.971667	1893717662
Araceae	Anthurium	Anthurium scandens	18.826944	-97.115	1897358335
Araceae	Anthurium	Anthurium scandens	19.433333	-97	1894469113
Araceae	Anthurium	Anthurium scandens	17.229444	-94.350278	1897358277
Araceae	Anthurium	Anthurium scandens	18.886	-96.9441	1988837377
Araceae	Anthurium	Anthurium scandens	19.45	-97.05	1930331776
Araceae	Anthurium	Anthurium scandens	17.922222	-92.512222	1894549524
Araceae	Anthurium	Anthurium scandens	17.705278	-92.455278	1894549519
Araceae	Anthurium	Anthurium scandens	17.918889	-92.581389	1894549516
Araceae	Anthurium	Anthurium scandens	17.858056	-92.634167	1894549540
Araceae	Anthurium	Anthurium scandens	18.896939	-96.988736	1895453028
Araceae	Anthurium	Anthurium scandens	19.21313482	-96.8800495	1895453048
Araceae	Anthurium	Anthurium scandens	19.870833	-96.775	1893313718
Araceae	Anthurium	Anthurium scandens	19.888333	-96.768056	1893313725
Araceae	Anthurium	Anthurium scandens	18.86089333	-96.90085187	1895453100
Araceae	Anthurium	Anthurium scandens	19.016667	-97.033333	1889171956
Araceae	Anthurium	Anthurium scandens	17.269167	-94.671944	1896071071
Araceae	Anthurium	Anthurium scandens	19.45756219	-96.94906893	1895453118
Araceae	Anthurium	Anthurium scandens	19.44	-96.72	1895453123
Araceae	Anthurium	Anthurium scandens	18.89176078	-96.9317187	1895453201
Araceae	Anthurium	Anthurium scandens	18.84	-96.91	1895453113
Araceae	Anthurium	Anthurium scandens	19.333333	-96.95	1896068256
Araceae	Anthurium	Anthurium scandens	19.4625	-96.922778	1896068257
Araceae	Anthurium	Anthurium scandens	19.411944	-96.949722	1896068264
Araceae	Anthurium	Anthurium scandens	17.705278	-92.566667	1896068267
Araceae	Anthurium	Anthurium scandens	17.6525	-92.473056	1896068268
Araceae	Anthurium	Anthurium scandens	17.696667	-92.789722	1896068251
Araceae	Anthurium	Anthurium scandens	19.373056	-96.924167	1896068247
Araceae	Anthurium	Anthurium scandens	17.597778	-92.826111	1896068262
Araceae	Anthurium	Anthurium scandens	18.66	-96.99	1258504188
Araceae	Anthurium	Anthurium scandens	19.379444	-97.009444	1419189243
Araceae	Anthurium	Anthurium scandens	18.336667	-94.858333	1896331057
Araceae	Anthurium	Anthurium scandens	19.54	-96.92	1258504186
Araceae	Anthurium	Anthurium scandens	18.84	-97.1	1258504179
Araceae	Anthurium	Anthurium scandens	18.558333	-95.225	1896331056
Araceae	Anthurium	Anthurium scandens	17.43	-95.02	1258504160
Araceae	Anthurium	Anthurium scandens	17.77	-94.64	1258504144
Araceae	Anthurium	Anthurium scandens	17.28	-94.546667	1896331106
Araceae	Anthurium	Anthurium scandens	17.259444	-94.644167	1896331060
Araceae	Anthurium	Anthurium scandens	19.513611	-96.940278	1896331032
Araceae	Anthurium	Anthurium scandens	17.458333	-94.558333	1896331059
Araceae	Anthurium	Anthurium scandens	18.28	-94.83	1258504189
Araceae	Anthurium	Anthurium scandens	18.36	-95.02	1258504111
Araceae	Anthurium	Anthurium scandens	18.89	-96.93	1258504102
Araceae	Anthurium	Anthurium scandens	18.325	-95.091667	1896331095
Araceae	Anthurium	Anthurium scandens	19.981111	-97.152778	1896330989
Araceae	Anthurium	Anthurium scandens	17.549444	-92.760278	1419218361
Araceae	Anthurium	Anthurium scandens	19.51	-96.95	1258504115
Araceae	Anthurium	Anthurium scandens	19.225	-96.775	1896330970
Araceae	Anthurium	Anthurium scandens	18.441667	-95.025	1896331093
Araceae	Anthurium	Anthurium scandens	18.43	-95.02	1258504143
Araceae	Anthurium	Anthurium scandens	19.2	-96.76	1258504140
Araceae	Anthurium	Anthurium scandens	18.89	-96.99	1258504129
Araceae	Anthurium	Anthurium scandens	18.9	-96.96	1258504120
Araceae	Anthurium	Anthurium scandens	18.91	-96.77	1258504116
Araceae	Anthurium	Anthurium scandens	17.27	-94.5	1258611171
Araceae	Anthurium	Anthurium scandens	18.525833	-95.18	1421362654
Araceae	Anthurium	Anthurium scandens	19.2025	-96.859444	1896331087
Araceae	Anthurium	Anthurium scandens	19.86	-96.77	1258504195
Araceae	Anthurium	Anthurium scandens	19.61	-96.94	1261084618
Araceae	Anthurium	Anthurium scandens	19.92	-96.85	1258504194
Araceae	Anthurium	Anthurium scandens	19.875	-96.591667	1896331068
Araceae	Anthurium	Anthurium scandens	17.253333	-94.591944	1896331091
Araceae	Anthurium	Anthurium scandens	19.341667	-96.958333	1896331063
Araceae	Anthurium	Anthurium scandens	18.9	-96.99	1258414443
Araceae	Anthurium	Anthurium scandens	18.408333	-94.775	1896331062
Araceae	Anthurium	Anthurium scandens	19.783333	-96.9	1896330990
Araceae	Anthurium	Anthurium scandens	18.943611	-96.8075	1896331033
Araceae	Anthurium	Anthurium scandens	17.258611	-94.615	1896331034
Araceae	Anthurium	Anthurium scandens	18.65	-97	1421361486
Araceae	Anthurium	Anthurium scandens	17.256944	-94.578056	1896331004
Araceae	Anthurium	Anthurium scandens	19.401667	-96.996667	1896331025
Araceae	Anthurium	Anthurium scandens	19.473333	-97.004167	1896331024
Araceae	Anthurium	Anthurium scandens	18.358333	-94.891667	1896331021
Araceae	Anthurium	Anthurium scandens	19.402778	-96.863333	1896331020
Araceae	Anthurium	Anthurium scandens	17.511667	-92.926667	1896331096
Araceae	Anthurium	Anthurium scandens	18.689722	-96.963333	1896331003
Araceae	Anthurium	Anthurium scandens	17.238889	-94.601111	1896331052
Araceae	Anthurium	Anthurium scandens	19.480278	-96.933056	1896331009
Araceae	Anthurium	Anthurium scandens	18.555	-95.2	1896331008
Araceae	Anthurium	Anthurium scandens	17.240278	-94.602778	1896331100
Araceae	Anthurium	Anthurium scandens	19.391667	-96.891667	1896331005
Araceae	Anthurium	Anthurium scandens	19.475	-96.95	1896331053
Araceae	Anthurium	Anthurium scandens	19.7925	-96.838333	1896331006
Araceae	Anthurium	Anthurium scandens	18.534167	-95.189444	1896331011
Araceae	Anthurium	Anthurium scandens	19.006667	-97.043056	1896331019
Araceae	Anthurium	Anthurium scandens	19.437222	-97.044444	1896331018
Araceae	Anthurium	Anthurium scandens	17.258333	-94.571667	1896331048
Araceae	Anthurium	Anthurium scandens	19.38	-96.938333	1896331017
Araceae	Anthurium	Anthurium scandens	19.516111	-96.995	1896331014
Araceae	Anthurium	Anthurium scandens	18.341667	-94.858333	1896331047
Araceae	Anthurium	Anthurium scandens	18.475	-95.008333	1896331040
Araceae	Anthurium	Anthurium scandens	18.558333	-95.208333	1896330995
Araceae	Anthurium	Anthurium scandens	20.431667	-98.348889	1896331041
Araceae	Anthurium	Anthurium scandens	18.394444	-94.938889	1896330996
Araceae	Anthurium	Anthurium scandens	19.5125	-97.016667	1896330992
Araceae	Anthurium	Anthurium scandens	19.45	-96.95	1258504087
Araceae	Anthurium	Anthurium scandens	17.5275	-92.922778	1056536297
Araceae	Anthurium	Anthurium scandens	18.619444	-95.071944	1896331038
Araceae	Anthurium	Anthurium scandens	17.251111	-94.612778	1896330994
Araceae	Anthurium	Anthurium scandens	19.445	-97.0225	1896331103
Araceae	Anthurium	Anthurium scandens	18.591667	-95.087778	1896331028
Araceae	Anthurium	Anthurium scandens	17.275	-94.575	1896331026
Araceae	Anthurium	Anthurium scandens	17.275	-94.591667	1896331044
Araceae	Anthurium	Anthurium scandens	19.775	-96.425	1896331054
Araceae	Anthurium	Anthurium scandens	19.450278	-96.942778	1896331045
Araceae	Anthurium	Anthurium scandens	17.2675	-94.611111	1896330999
Araceae	Anthurium	Anthurium scandens	19.866667	-96.776944	1896331120
Araceae	Anthurium	Anthurium scandens	18.9142	-96.7772	1989524017
Araceae	Anthurium	Anthurium scandens	18.247222	-94.869444	1896331037
Araceae	Anthurium	Anthurium scandens	17.291667	-94.608333	1896331136
Araceae	Anthurium	Anthurium scandens	18.366667	-95.016667	1418342162
Araceae	Anthurium	Anthurium scandens	19.408333	-97.008333	1896331124
Araceae	Anthurium	Anthurium scandens	17.300278	-94.616111	1896331133
Araceae	Anthurium	Anthurium scandens	17.475	-95.141667	1896331112
Araceae	Anthurium	Anthurium scandens	18.891667	-97.025	1896331113
Araceae	Anthurium	Anthurium scandens	17.258333	-94.625	1896331114
Araceae	Anthurium	Anthurium scandens	18.8857	-96.9457	1988675236
Araceae	Anthurium	Anthurium scandens	17.255278	-94.615556	1896331036
Araceae	Anthurium	Anthurium scandens	17.275	-94.675	1418346434
Araceae	Anthurium	Anthurium scandens	18.619444	-95.088889	1896331116
Araceae	Anthurium	Anthurium scandens	17.2125	-94.588056	1896331117
Araceae	Anthurium	Anthurium scandens	17.255	-94.585	1896331081
Araceae	Anthurium	Anthurium scandens	19.458333	-97.058333	1896331153
Araceae	Anthurium	Anthurium scandens	17.700556	-92.543333	1896331147
Araceae	Anthurium	Anthurium scandens	18.8414	-96.8868	1989356019
Araceae	Anthurium	Anthurium scandens	18.66	-96.9	1258504223
Araceae	Anthurium	Anthurium scandens	20.43	-98.34	1258504204
Araceae	Anthurium	Anthurium scandens	19.865	-96.775556	1896321903
Araceae	Anthurium	Anthurium scandens	19.891667	-97.191667	1896321900
Araceae	Anthurium	Anthurium scandens	19.758333	-96.675	1896321888
Araceae	Anthurium	Anthurium scandens	19.397778	-96.978889	1896321884
Araceae	Anthurium	Anthurium scandens	18.566944	-95.107222	1896321881
Araceae	Anthurium	Anthurium scandens	18.8839	-96.9384	1989507353
Araceae	Anthurium	Anthurium scandens	18.450278	-95.070278	1896331078
Araceae	Anthurium	Anthurium scandens	18.11	-94.09	1261084646
Araceae	Anthurium	Anthurium scandens	18.656529	-97.01176	1896331143
Araceae	Anthurium	Anthurium scandens	19.21	-96.87	1261073571
Araceae	Anthurium	Anthurium scandens	19.225	-96.908333	1894898106
Araceae	Anthurium	Anthurium schlechtendalii	19.21	-96.8	1260994717
Araceae	Anthurium	Anthurium schlechtendalii	18.846111	-97.135	1896065299
Araceae	Anthurium	Anthurium schlechtendalii	18.420183	-92.642283	1893815225
Araceae	Anthurium	Anthurium schlechtendalii	18.472056	-92.456361	1893815244
Araceae	Anthurium	Anthurium schlechtendalii	17.46675	-92.800194	1894468911
Araceae	Anthurium	Anthurium schlechtendalii	19.45	-96.716667	1894468905
Araceae	Anthurium	Anthurium schlechtendalii	17.25	-94.6	1421407828
Araceae	Anthurium	Anthurium schlechtendalii	18.8	-96.66	1260993013
Araceae	Anthurium	Anthurium schlechtendalii	18.26805	-92.6075	1260042467
Araceae	Anthurium	Anthurium schlechtendalii	18	-93.373889	1261005339
Araceae	Anthurium	Anthurium schlechtendalii	17.8	-91.53	1261005215
Araceae	Anthurium	Anthurium schlechtendalii	17.31	-94.36	1261067088
Araceae	Anthurium	Anthurium schlechtendalii	19.322778	-96.935	1896125018
Araceae	Anthurium	Anthurium schlechtendalii	19.2	-96.95	1260940491
Araceae	Anthurium	Anthurium schlechtendalii	17.266667	-94.533333	1421410634
Araceae	Anthurium	Anthurium schlechtendalii	18.158333	-92.130556	1421361209
Araceae	Anthurium	Anthurium schlechtendalii	18.456111	-92.471944	1894546868
Araceae	Anthurium	Anthurium schlechtendalii	18.43772352	-95.06872906	1895422478
Araceae	Anthurium	Anthurium schlechtendalii	18.8	-96.6667	1835735227
Araceae	Anthurium	Anthurium schlechtendalii	17.283333	-94.583333	1421402097
Araceae	Anthurium	Anthurium schlechtendalii	19.783333	-96.416667	1999432393
Araceae	Anthurium	Anthurium schlechtendalii	18.41	-95.0883	1936429412
Araceae	Anthurium	Anthurium schlechtendalii	18.55	-95	1261046620
Araceae	Anthurium	Anthurium schlechtendalii	18.46	-96.63	1260957159
Araceae	Anthurium	Anthurium schlechtendalii	19.254167	-96.840833	1896061151
Araceae	Anthurium	Anthurium schlechtendalii	18.441944	-95.075	1896061145
Araceae	Anthurium	Anthurium schlechtendalii	17.3	-94.633333	1896061144
Araceae	Anthurium	Anthurium schlechtendalii	18.41	-96.41	1261046378
Araceae	Anthurium	Anthurium schlechtendalii	19.653333	-96.871667	1893721342
Araceae	Anthurium	Anthurium schlechtendalii	17.78	-94.63	1260993127
Araceae	Anthurium	Anthurium schlechtendalii	17.546111	-92.811111	1419195650
Araceae	Anthurium	Anthurium schlechtendalii	18.384722	-95.001944	1894468848
Araceae	Anthurium	Anthurium schlechtendalii	19.340972	-96.450389	1418348427
Araceae	Anthurium	Anthurium schlechtendalii	17.21	-94.21	1261065718
Araceae	Anthurium	Anthurium schlechtendalii	17.25	-94.666667	1421376963
Araceae	Anthurium	Anthurium schlechtendalii	19.23	-96.755	1893721332
Araceae	Anthurium	Anthurium schlechtendalii	17.54	-92.88	1261030405
Araceae	Anthurium	Anthurium schlechtendalii	17.54	-92.92	1260993640
Araceae	Anthurium	Anthurium schlechtendalii	18.594722	-95.09	1261029630
Araceae	Anthurium	Anthurium schlechtendalii	17.3	-94.65	1421359985
Araceae	Anthurium	Anthurium schlechtendalii	18.78	-96.52	1261030910
Araceae	Anthurium	Anthurium schlechtendalii	17.841667	-91.141667	1896125003
Araceae	Anthurium	Anthurium schlechtendalii	17.252778	-94.593889	1896124924
Araceae	Anthurium	Anthurium schlechtendalii	18.56	-95.06	1260996874
Araceae	Anthurium	Anthurium schlechtendalii	19.35	-96.8	1260996785
Araceae	Anthurium	Anthurium schlechtendalii	19.21666	-96.98333	1261009300
Araceae	Anthurium	Anthurium schlechtendalii	17.238889	-94.596944	1896124921
Araceae	Anthurium	Anthurium schlechtendalii	18.53	-95.3	1261009974
Araceae	Anthurium	Anthurium schlechtendalii	17.245833	-94.616944	1896124927
Araceae	Anthurium	Anthurium schlechtendalii	17.359444	-94.598333	1421418601
Araceae	Anthurium	Anthurium schlechtendalii	19.388889	-96.884167	1896124925
Araceae	Anthurium	Anthurium schlechtendalii	19.534167	-96.694167	1896124916
Araceae	Anthurium	Anthurium schlechtendalii	18.5917	-95.05	1928285272
Araceae	Anthurium	Anthurium schlechtendalii	19.284444	-96.720278	1896124900
Araceae	Anthurium	Anthurium schlechtendalii	18.589167	-95.088056	1896124898
Araceae	Anthurium	Anthurium schlechtendalii	17.251667	-94.616111	1896124897
Araceae	Anthurium	Anthurium schlechtendalii	19.543333	-96.438056	1893802256
Araceae	Anthurium	Anthurium schlechtendalii	19.573333	-96.784167	1893802255
Araceae	Anthurium	Anthurium schlechtendalii	19.228889	-96.753889	1896124905
Araceae	Anthurium	Anthurium schlechtendalii	18.5075	-95.032778	1896124911
Araceae	Anthurium	Anthurium schlechtendalii	18.941667	-96.808333	1896124932
Araceae	Anthurium	Anthurium schlechtendalii	17.266667	-94.6	1421417456
Araceae	Anthurium	Anthurium schlechtendalii	19.335833	-96.765	1893802254
Araceae	Anthurium	Anthurium schlechtendalii	18.758333	-97.0475	1896299466
Araceae	Anthurium	Anthurium schlechtendalii	17.248889	-94.611667	1896299462
Araceae	Anthurium	Anthurium schlechtendalii	17.271944	-94.550833	1896299456
Araceae	Anthurium	Anthurium schlechtendalii	17.325	-94.375	1896299453
Araceae	Anthurium	Anthurium schlechtendalii	18.82	-97.16	1261065781
Araceae	Anthurium	Anthurium schlechtendalii	17.252778	-94.595	1896299475
Araceae	Anthurium	Anthurium schlechtendalii	17.258333	-94.508333	1896299473
Araceae	Anthurium	Anthurium schlechtendalii	19.203889	-96.737778	1896124969
Araceae	Anthurium	Anthurium schlechtendalii	18	-94.57	1261008769
Araceae	Anthurium	Anthurium schlechtendalii	17.221667	-94.678611	1896299482
Araceae	Anthurium	Anthurium schlechtendalii	18.780556	-96.914444	1896299470
Araceae	Anthurium	Anthurium schlechtendalii	17.236111	-94.601389	1896299491
Araceae	Anthurium	Anthurium schlechtendalii	18.6276	-96.6513	1989116293
Araceae	Anthurium	Anthurium schlechtendalii	17.808333	-91.541667	1896124949
Araceae	Anthurium	Anthurium schlechtendalii	19.13333	-96.93333	1261008287
Araceae	Anthurium	Anthurium schlechtendalii	18.51	-95	1261037157
Araceae	Anthurium	Anthurium schlechtendalii	18.391667	-94.808333	1896124938
Araceae	Anthurium	Anthurium schlechtendalii	18.787773	-96.482634	1896124955
Araceae	Anthurium	Anthurium schlechtendalii	19.35	-96.775	1896124957
Araceae	Anthurium	Anthurium schlechtendalii	17.264444	-94.617778	1896299442
Araceae	Anthurium	Anthurium schlechtendalii	19.77	-96.43	1261009225
Araceae	Anthurium	Anthurium schlechtendalii	17.291667	-94.625	1896298636
Araceae	Anthurium	Anthurium schlechtendalii	17.275	-94.558333	1896298633
Araceae	Anthurium	Anthurium schlechtendalii	18.458333	-95.291667	1896124961
Araceae	Anthurium	Anthurium schlechtendalii	17.264444	-94.620833	1896124966
Araceae	Anthurium	Anthurium schlechtendalii	19.589722	-96.81	1893802252
Araceae	Anthurium	Anthurium schlechtendalii	18.83	-97.14	1260995464
Araceae	Anthurium	Anthurium schlechtendalii	18.525	-95.058333	1896124878
Araceae	Anthurium	Anthurium schlechtendalii	19.366667	-96.808333	1896124881
Araceae	Anthurium	Anthurium schlechtendalii	19.241667	-96.841667	1896124882
Araceae	Anthurium	Anthurium schlechtendalii	17.249722	-94.616944	1896124884
Araceae	Anthurium	Anthurium schlechtendalii	17.256944	-94.616667	1896124888
Araceae	Anthurium	Anthurium schlechtendalii	19.32	-96.75	1261065810
Araceae	Anthurium	Anthurium schlechtendalii	19.360278	-96.884167	1893802232
Araceae	Anthurium	Anthurium schlechtendalii	17.458333	-95.058333	1896124868
Araceae	Anthurium	Anthurium schlechtendalii	17.54	-92.82	1261040621
Araceae	Anthurium	Anthurium schlechtendalii	19.524722	-96.978889	1896124867
Araceae	Anthurium	Anthurium schlechtendalii	19.791667	-96.691667	1896124865
Araceae	Anthurium	Anthurium schlechtendalii	17.436944	-95.036667	1896124864
Araceae	Anthurium	Anthurium schlechtendalii	17.26	-94.55	1260995615
Araceae	Anthurium	Anthurium schlechtendalii	19.218889	-96.846944	1896124866
Araceae	Anthurium	Anthurium schlechtendalii	17.56	-94.73	1261005988
Araceae	Anthurium	Anthurium schlechtendalii	19.208889	-96.670556	1896124861
Araceae	Anthurium	Anthurium schlechtendalii	18.5225	-95.040833	1896124869
Araceae	Anthurium	Anthurium schlechtendalii	18.426111	-95.094722	1896124872
Araceae	Anthurium	Anthurium schlechtendalii	17.254722	-94.616389	1896124979
Araceae	Anthurium	Anthurium schlechtendalii	18.5	-95.16	1260905416
Araceae	Anthurium	Anthurium schlechtendalii	18.86	-96.89	1260995406
Araceae	Anthurium	Anthurium schlechtendalii	19.346389	-96.776944	1893802247
Araceae	Anthurium	Anthurium schlechtendalii	19.408333	-96.858333	1896124988
Araceae	Anthurium	Anthurium schlechtendalii	18.41	-95.11	1261005658
Araceae	Anthurium	Anthurium schlechtendalii	18.6	-95.08333	1260265217
Araceae	Anthurium	Anthurium schlechtendalii	18.880556	-97.002222	1896124995
Araceae	Anthurium	Anthurium schlechtendalii	19.45	-96.72	1261005721
Araceae	Anthurium	Anthurium schlechtendalii	18.811389	-96.72	1896124896
Araceae	Anthurium	Anthurium schlechtendalii	19.375	-96.805	1896124975
Araceae	Anthurium	Anthurium schlechtendalii	18.875	-96.758333	1896124889
Araceae	Anthurium	Anthurium schlechtendalii	18.828032	-97.13141	1896124972
Araceae	Anthurium	Anthurium schlechtendalii	18.541667	-95.325	1896124895
Araceae	Monstera	Monstera deliciosa	18.68889	-97.02167	1896190464
Araceae	Monstera	Monstera deliciosa	19.16528	-96.96083	1896190465
Araceae	Monstera	Monstera deliciosa	18.40833	-94.925	1896190451
Araceae	Monstera	Monstera deliciosa	18.78056	-96.91444	1896190461
Araceae	Monstera	Monstera deliciosa	19.66417	-97.16167	1896190463
Araceae	Monstera	Monstera deliciosa	18.31	-94.71	1258604613
Araceae	Monstera	Monstera deliciosa	17.27	-94.52	1258604621
Araceae	Monstera	Monstera deliciosa	18.31667	-94.83333	1260698545
Araceae	Monstera	Monstera deliciosa	18.45861	-95.1877	1895471751
Araceae	Monstera	Monstera deliciosa	17.76515	-94.69638	1893825085
Araceae	Monstera	Monstera deliciosa	18.525	-95.05833	1896190497
Araceae	Monstera	Monstera deliciosa	18.55	-95.15	1260265230
Araceae	Monstera	Monstera deliciosa	18.45	-95.18	1258432002
Araceae	Monstera	Monstera tuberculata	18.56667	-95.73333	1258866709
Araceae	Monstera	Monstera tuberculata	18.49722	-95.04194	1260877424
Araceae	Monstera	Monstera tuberculata	17.54028	-92.90833	1896252499
Araceae	Monstera	Monstera tuberculata	17.23444	-94.59778	1896252481
Araceae	Monstera	Monstera tuberculata	18.45028	-95.07028	1896252485
Araceae	Monstera	Monstera tuberculata	17.47417	-93.825	1896252487
Araceae	Monstera	Monstera tuberculata	17.5301	-91.4098	1988723757
Araceae	Monstera	Monstera tuberculata	18.57	-95.06	1258604709
Araceae	Monstera	Monstera tuberculata	18.02	-94.54	1258604715
Araceae	Monstera	Monstera tuberculata	18.25611	-94.95	1897364672
Araceae	Monstera	Monstera tuberculata	17.975	-94.50583	1896051064
Araceae	Monstera	Monstera tuberculata	17.44139	-92.76556	1896051066
Araceae	Monstera	Monstera tuberculata	17.595	-92.92389	1896051067
Araceae	Monstera	Monstera tuberculata	18.01948	-94.56022	1895404290
Araceae	Monstera	Monstera tuberculata	17.39583	-94.06944	1419168531
Araceae	Monstera	Monstera tuberculata	17.849	-91.6112	1988600952
Araceae	Monstera	Monstera tuberculata	18.6	-95.06666	1260265256
Araceae	Philodendron	Philodendron radiatum	18.40222	-95.10167	1894471243
Araceae	Philodendron	Philodendron radiatum	17.60556	-93.51889	1894552038
Araceae	Philodendron	Philodendron radiatum	18.83361	-96.91694	1896074450
Araceae	Philodendron	Philodendron radiatum	19.32278	-96.73917	1896074452
Araceae	Philodendron	Philodendron radiatum	18.04306	-94.12778	1894552043
Araceae	Philodendron	Philodendron radiatum	21.18528	-97.88444	1896074453
Araceae	Philodendron	Philodendron radiatum	19.95	-96.86	1261083797
Araceae	Philodendron	Philodendron radiatum	19.84583	-96.58083	1896276318
Araceae	Philodendron	Philodendron radiatum	17.37775	-93.54947	1257683513
Araceae	Philodendron	Philodendron radiatum	18.05611	-94.15139	1261083481
Araceae	Philodendron	Philodendron radiatum	18.28	-96.21	1261083728
Araceae	Philodendron	Philodendron radiatum	17.84438	-93.52257	1895476399
Araceae	Philodendron	Philodendron radiatum	19.32222	-96.74722	1896134043
Araceae	Philodendron	Philodendron radiatum	19.14	-96.96	1261068415
Araceae	Philodendron	Philodendron radiatum	17.84444	-93.525	1421405799
Araceae	Philodendron	Philodendron radiatum	19.88333	-96.79444	1896134018
Araceae	Philodendron	Philodendron radiatum	17.24583	-94.61694	1896134019
Araceae	Philodendron	Philodendron radiatum	17.24028	-94.60278	1896134010
Araceae	Philodendron	Philodendron radiatum	19.34639	-96.77694	1893803490
Araceae	Philodendron	Philodendron radiatum	17.29167	-94.625	1896134028
Araceae	Philodendron	Philodendron radiatum	17.25167	-94.61611	1896134023
Araceae	Philodendron	Philodendron radiatum	17.24833	-94.61056	1896134025
Araceae	Philodendron	Philodendron sagittifolium	19.89	-96.75	1261087176
Araceae	Philodendron	Philodendron sagittifolium	20.15	-96.85	1261087175
Araceae	Philodendron	Philodendron sagittifolium	18.33	-95.1	1261071372
Araceae	Philodendron	Philodendron sagittifolium	19.8	-96.76	1261071408
Araceae	Philodendron	Philodendron sagittifolium	20.05833	-96.89167	1896122277
Araceae	Philodendron	Philodendron sagittifolium	19.79917	-96.74806	1896122286
Araceae	Philodendron	Philodendron sagittifolium	19.21167	-96.85389	1421414994
Araceae	Philodendron	Philodendron sagittifolium	17.55	-94.73	1261071415
Araceae	Philodendron	Philodendron sagittifolium	18.63	-95.08	1261029004
Araceae	Philodendron	Philodendron sagittifolium	19.225	-96.74167	1896122274
Araceae	Philodendron	Philodendron sagittifolium	17.37389	-93.63083	1257799637
Araceae	Philodendron	Philodendron sagittifolium	19.2	-96.87	912335070
Araceae	Philodendron	Philodendron sagittifolium	18.44	-95.04	1261071436
Araceae	Philodendron	Philodendron sagittifolium	17.25861	-94.615	1896122292
Araceae	Philodendron	Philodendron sagittifolium	17.24972	-94.61139	1896122293
Araceae	Philodendron	Philodendron sagittifolium	17.26	-94.66	1261071577
Araceae	Philodendron	Philodendron sagittifolium	17.31	-94.4	1261071344
Araceae	Philodendron	Philodendron sagittifolium	17.31	-94.63	1261071363
Araceae	Philodendron	Philodendron tripartitum	18.28	-94.71	1260983364
Araceae	Philodendron	Philodendron tripartitum	18.00806	-94.58556	1896247542
Araceae	Philodendron	Philodendron tripartitum	18.53333	-95.15	1260265248
Araceae	Philodendron	Philodendron tripartitum	17.93944	-94.48361	1896067470
Araceae	Philodendron	Philodendron tripartitum	17.46667	-92.77417	1260901008
Araceae	Pistia	Pistia stratiotes	19.53667	-96.83333	1896177643
Araceae	Pistia	Pistia stratiotes	18.435	-93.25083	1895107041
Araceae	Pistia	Pistia stratiotes	22.69944	-99.04564	1893942550
Araceae	Pistia	Pistia stratiotes	18.63611	-95.55556	1895107080
Araceae	Pistia	Pistia stratiotes	18.35167	-95.18333	1896177639
Araceae	Pistia	Pistia stratiotes	22.34836	-97.88075	1893942548
Araceae	Pistia	Pistia stratiotes	21.15167	-97.835	1895107052
Araceae	Pistia	Pistia stratiotes	19.91667	-96.51806	1895107227
Araceae	Pistia	Pistia stratiotes	22.31589	-97.89833	1893942595
Araceae	Pistia	Pistia stratiotes	22.06944	-97.775	1895107105
Araceae	Pistia	Pistia stratiotes	19.45833	-96.75	1895107078
Araceae	Pistia	Pistia stratiotes	22.70083	-99.11667	1893942581
Araceae	Pistia	Pistia stratiotes	19.22111	-96.225	1895107079
Araceae	Pistia	Pistia stratiotes	18.41346	-92.99301	1894874125
Araceae	Pistia	Pistia stratiotes	17.87472	-94.095	1260076588
Araceae	Pistia	Pistia stratiotes	18.01605	-94.07822	1893814654
Araceae	Pistia	Pistia stratiotes	18.06666	-94.5	1260076674
Araceae	Pistia	Pistia stratiotes	22.78333	-98.87	1893942500
Araceae	Pistia	Pistia stratiotes	22.70456	-99.03592	1894471392
Araceae	Pistia	Pistia stratiotes	18.33985	-92.97802	1897335302
Araceae	Pistia	Pistia stratiotes	18.345	-95.79167	1895107159
Araceae	Pistia	Pistia stratiotes	17.475	-91.25278	1895107037
Araceae	Pistia	Pistia stratiotes	17.76667	-91.15	1894471447
Araceae	Pistia	Pistia stratiotes	18.4	-92.675	1895107167
Araceae	Pistia	Pistia stratiotes	18.34019	-95.78942	1895515852
Araceae	Pistia	Pistia stratiotes	18.0625	-94.5	1895107073
Araceae	Pistia	Pistia stratiotes	18.2085	-92.3589	1893814656
Araceae	Pistia	Pistia stratiotes	18.06389	-94.5	1895107019
Araceae	Pistia	Pistia stratiotes	18.41077	-92.65218	1893814655
Araceae	Pistia	Pistia stratiotes	19.43333	-96.66389	1895107029
Araceae	Pistia	Pistia stratiotes	22.25216	-97.80341	1895515838
Araceae	Pistia	Pistia stratiotes	22.39069	-98.42017	1893942547
Araceae	Pistia	Pistia stratiotes	18.40833	-93.00833	1896177649
Araceae	Pistia	Pistia stratiotes	18.23694	-93.33667	1895107086
Araceae	Pistia	Pistia stratiotes	17.66944	-92.40833	1895107093
Araceae	Pistia	Pistia stratiotes	21.15	-97.83333	1895515572
Araceae	Pistia	Pistia stratiotes	18.50833	-95.01667	1895107122
Araceae	Pistia	Pistia stratiotes	18.03639	-92.26636	1893814653
Araceae	Pistia	Pistia stratiotes	17.90252	-93.88507	1893814651
Araceae	Pistia	Pistia stratiotes	18.93667	-96.46333	1893681294
Araceae	Pistia	Pistia stratiotes	19.18472	-96.30333	1895107109
Araceae	Pistia	Pistia stratiotes	22.225	-98.00833	1896177679
Araceae	Pistia	Pistia stratiotes	18.40528	-93.04167	1895107011
Araceae	Pistia	Pistia stratiotes	18.49222	-92.68694	1894075685
Araceae	Pistia	Pistia stratiotes	18.37306	-92.55	1896177675
Araceae	Pistia	Pistia stratiotes	19.8375	-96.59444	1895107068
Araceae	Pistia	Pistia stratiotes	18.39306	-94.77944	1896177677
Araceae	Pistia	Pistia stratiotes	18.22963	-92.33613	1893814670
Araceae	Pistia	Pistia stratiotes	18.42139	-92.65083	1894075598
Araceae	Pistia	Pistia stratiotes	18.37333	-92.55	1895107063
Araceae	Pistia	Pistia stratiotes	18.05833	-94.49167	1896177684
Araceae	Pistia	Pistia stratiotes	18.37	-92.67611	1894075616
Araceae	Pistia	Pistia stratiotes	18.33611	-92.22944	1894551816
Araceae	Pistia	Pistia stratiotes	23.2333	-98.1667	1989450121
Araceae	Pistia	Pistia stratiotes	20.18611	-96.76389	1895107180
Araceae	Pistia	Pistia stratiotes	19.25556	-96.26667	1896177666
Araceae	Pistia	Pistia stratiotes	18.52556	-95.04694	1896177669
Araceae	Pistia	Pistia stratiotes	17.98333	-93.36667	1895107064
Araceae	Pistia	Pistia stratiotes	19.13139	-96.44278	1896177672
Araceae	Pistia	Pistia stratiotes	19.53556	-96.925	1895107084
Araceae	Pistia	Pistia stratiotes	17.7953	-91.5427	1989523674
Araceae	Pistia	Pistia stratiotes	18.37396	-92.54994	1894874138
Araceae	Pistia	Pistia stratiotes	18.485	-95.03389	1895107166
Araceae	Pistia	Pistia stratiotes	17.97552	-92.45168	1894874630
Araceae	Pistia	Pistia stratiotes	17.91667	-92.475	1896177711
Araceae	Pistia	Pistia stratiotes	18.35277	-92.955	1260076569
Araceae	Pistia	Pistia stratiotes	18.0859	-92.41068	1893814664
Araceae	Pistia	Pistia stratiotes	18.41278	-92.99306	1895107100
Araceae	Pistia	Pistia stratiotes	18.3501	-93.0546	1989271110
Araceae	Pistia	Pistia stratiotes	18.075	-94.50833	1896177712
Araceae	Pistia	Pistia stratiotes	18.18853	-92.68461	1893814660
Araceae	Pistia	Pistia stratiotes	18.60956	-92.53991	1894874132
Araceae	Pistia	Pistia stratiotes	19.23278	-96.30833	1895107055
Araceae	Pistia	Pistia stratiotes	17.96806	-92.46111	1895107015
Araceae	Pistia	Pistia stratiotes	18.03333	-94.53333	1895107142
Araceae	Pistia	Pistia stratiotes	19.93611	-96.73333	1895107074
Araceae	Pistia	Pistia stratiotes	19.21666	-96.3	1258673246
Araceae	Pistia	Pistia stratiotes	19.4	-96.36	1258907400
Araceae	Pistia	Pistia stratiotes	18.16777	-94.11555	1260076556
Araceae	Spathiphyllum	Spathiphyllum friedrichsthalii	18.58472	-95.07389	1896266170
Araceae	Spathiphyllum	Spathiphyllum friedrichsthalii	18.53222	-95.30722	1896266168
Araceae	Spathiphyllum	Spathiphyllum friedrichsthalii	17.29167	-94.50833	1896266138
Araceae	Spathiphyllum	Spathiphyllum phryniifolium	17.1825	-94.34778	1897571337
Araceae	Spathiphyllum	Spathiphyllum phryniifolium	18.11056	-93.22306	1894547475
Araceae	Spathiphyllum	Spathiphyllum phryniifolium	18.12	-93.195	1894547459
Araceae	Spathiphyllum	Spathiphyllum phryniifolium	17.85347	-92.621	1894547448
Araceae	Spathiphyllum	Spathiphyllum phryniifolium	17.79917	-92.57778	1894547470
Araceae	Syngonium	Syngonium angustatum	17.70028	-92.25028	1894995544
Araceae	Syngonium	Syngonium angustatum	19.46389	-96.94444	1896192945
Araceae	Syngonium	Syngonium angustatum	17.54333	-92.80333	1896192946
Araceae	Syngonium	Syngonium angustatum	17.60833	-91.025	1896192949
Araceae	Syngonium	Syngonium angustatum	17.36083	-93.76417	1896192938
Araceae	Syngonium	Syngonium angustatum	17.91	-92.91	1258622412
Araceae	Syngonium	Syngonium angustatum	18.06	-95.51	1258622407
Araceae	Syngonium	Syngonium angustatum	19.31	-96.76	1258622388
Araceae	Syngonium	Syngonium angustatum	19.46667	-96.93417	1894470319
Araceae	Syngonium	Syngonium angustatum	18.38472	-95.00194	1894470359
Araceae	Syngonium	Syngonium neglectum	18.58514	-95.07433	1846544250
Araceae	Syngonium	Syngonium neglectum	18.01	-94.92	1258622564
Araceae	Syngonium	Syngonium neglectum	19.365	-96.83166	1260876225
Araceae	Syngonium	Syngonium neglectum	19.54139	-96.97444	1896289167
Araceae	Syngonium	Syngonium neglectum	18.55833	-95.19167	1896289174
Araceae	Syngonium	Syngonium neglectum	19.725	-96.68778	1896289133
Araceae	Syngonium	Syngonium neglectum	18.82	-96.92	1261089619
Araceae	Syngonium	Syngonium neglectum	19.50306	-96.805	1896289181
Araceae	Syngonium	Syngonium neglectum	21.15	-97.83	1258622503
Araceae	Syngonium	Syngonium neglectum	19.20833	-96.875	1894471649
Araceae	Syngonium	Syngonium neglectum	19.55	-96.96	1261089645
Araceae	Syngonium	Syngonium neglectum	17.45	-94.88333	1896067176
Araceae	Syngonium	Syngonium neglectum	20.75333	-97.90667	1893673981
Araceae	Syngonium	Syngonium podophyllum	17.755	-94.76028	1896197056
Araceae	Syngonium	Syngonium podophyllum	17.57861	-92.57028	1894548809
Araceae	Syngonium	Syngonium podophyllum	17.675	-94.14167	1896197059
Araceae	Syngonium	Syngonium podophyllum	17.39028	-93.92917	1894548725
Araceae	Syngonium	Syngonium podophyllum	18.04556	-94.09778	1894548767
Araceae	Syngonium	Syngonium podophyllum	17.82083	-92.42306	1894548797
Araceae	Syngonium	Syngonium podophyllum	18.46167	-95.08056	1896197168
Araceae	Syngonium	Syngonium podophyllum	17.57	-92.61	1260100374
Araceae	Syngonium	Syngonium podophyllum	18.61028	-95.23861	1896197157
Araceae	Syngonium	Syngonium podophyllum	19.32222	-96.77222	1896197159
Araceae	Syngonium	Syngonium podophyllum	18.26231	-95.11927	1895393597
Araceae	Syngonium	Syngonium podophyllum	18.52	-96.57	1260921363
Araceae	Syngonium	Syngonium podophyllum	17.92917	-93.39028	1895393641
Araceae	Syngonium	Syngonium podophyllum	17.8002	-92.6906	1989044299
Araceae	Syngonium	Syngonium podophyllum	18	-93.54667	1896197111
Araceae	Syngonium	Syngonium podophyllum	21.54167	-97.675	1896197142
Araceae	Syngonium	Syngonium podophyllum	18.60333	-95.0725	1895652191
Araceae	Syngonium	Syngonium podophyllum	18.14254	-94.47745	1895393622
Araceae	Syngonium	Syngonium podophyllum	17.48	-92.81	1261061100
Araceae	Syngonium	Syngonium podophyllum	23.03	-99.13	1261083630
Araceae	Syngonium	Syngonium podophyllum	19.775	-96.95833	1893411126
Araceae	Syngonium	Syngonium podophyllum	19.80833	-96.99167	1893411115
Araceae	Syngonium	Syngonium podophyllum	18.00833	-93.35833	1893411062
Araceae	Syngonium	Syngonium podophyllum	17.965	-92.08667	1893661948
Araceae	Syngonium	Syngonium podophyllum	18.53	-95.03	1258622679
Araceae	Syngonium	Syngonium podophyllum	17.28	-94.6	1258622712
Araceae	Syngonium	Syngonium podophyllum	17.72758	-95.08511	1419168137
Araceae	Syngonium	Syngonium podophyllum	18.52	-95	1258622701
Araceae	Syngonium	Syngonium podophyllum	17.94167	-93.325	1894997196
Araceae	Syngonium	Syngonium podophyllum	19.38	-96.97	1258622694
Araceae	Syngonium	Syngonium podophyllum	20.47806	-97.18528	1896065589
Araceae	Syngonium	Syngonium podophyllum	19.45	-96.36666	1258622724
Araceae	Syngonium	Syngonium podophyllum	17.51778	-92.77306	1896065560
Araceae	Syngonium	Syngonium podophyllum	17.25	-94.56	1258456360
Araceae	Syngonium	Syngonium podophyllum	17.69722	-92.80083	1896065566
Araceae	Xanthosoma	Xanthosoma robustum	18.56944	-95.33972	1896153590
Araceae	Xanthosoma	Xanthosoma robustum	17.80833	-94.55833	1896153582
Araceae	Xanthosoma	Xanthosoma robustum	19.88	-97.21	1258617678
Araceae	Xanthosoma	Xanthosoma robustum	19.92	-96.72	1258617730
Araceae	Xanthosoma	Xanthosoma robustum	24.6198	-99.0128	1988681377
Araceae	Xanthosoma	Xanthosoma robustum	17.64333	-95.65361	1896153579
Araceae	Xanthosoma	Xanthosoma robustum	23.27794	-98.86272	1893941917
Araceae	Xanthosoma	Xanthosoma robustum	22.55361	-99.09125	1893941927
Araceae	Xanthosoma	Xanthosoma robustum	23.43519	-99.26847	1893941956
Araceae	Xanthosoma	Xanthosoma robustum	23.01875	-99.54419	1893941989
Araceae	Xanthosoma	Xanthosoma robustum	23.14667	-99.15167	1893942019
Araceae	Xanthosoma	Xanthosoma robustum	19.80833	-96.90833	1893418797
Araceae	Xanthosoma	Xanthosoma robustum	18.61	-95.06	1258308032
Araceae	Xanthosoma	Xanthosoma robustum	18	-93.4	1259948718
Araceae	Xanthosoma	Xanthosoma robustum	19.53	-96.68	1258481061
Araliaceae	Dendropanax	Dendropanax arboreus	19.42	-97.05	1228479131
Araliaceae	Dendropanax	Dendropanax arboreus	18.106028	-94.358194	1258007374
Araliaceae	Dendropanax	Dendropanax arboreus	19.4400634	-96.81421767	1895385856
Araliaceae	Dendropanax	Dendropanax arboreus	19.5825	-96.8583	1228501969
Araliaceae	Dendropanax	Dendropanax arboreus	18.375	-94.775	1418344624
Araliaceae	Dendropanax	Dendropanax arboreus	18.72246882	-95.86487384	1895385793
Araliaceae	Dendropanax	Dendropanax arboreus	19.461111	-96.833333	1418343216
Araliaceae	Dendropanax	Dendropanax arboreus	18.417844	-94.993469	1897491321
Araliaceae	Dendropanax	Dendropanax arboreus	19.72839241	-96.67310725	1895385718
Araliaceae	Dendropanax	Dendropanax arboreus	19.875	-96.825	1895053742
Araliaceae	Dendropanax	Dendropanax arboreus	18.42095915	-94.76388576	1895385755
Araliaceae	Dendropanax	Dendropanax arboreus	19.3514	-96.4331	1228464385
Araliaceae	Dendropanax	Dendropanax arboreus	18.441389	-95.214167	1895053737
Araliaceae	Dendropanax	Dendropanax arboreus	18.92588091	-97.02218495	1895385737
Araliaceae	Dendropanax	Dendropanax arboreus	18.4904024	-92.64105739	1894874308
Araliaceae	Dendropanax	Dendropanax arboreus	18.531667	-95.049167	1895385780
Araliaceae	Dendropanax	Dendropanax arboreus	19.74162961	-96.7363228	1895385773
Araliaceae	Dendropanax	Dendropanax arboreus	19.65	-96.866667	1895385772
Araliaceae	Dendropanax	Dendropanax arboreus	19.416667	-97.05	1895385767
Araliaceae	Dendropanax	Dendropanax arboreus	18.206389	-94.026944	1895138578
Araliaceae	Dendropanax	Dendropanax arboreus	17.233333	-94.275	1895385693
Araliaceae	Dendropanax	Dendropanax arboreus	19.216667	-96.983333	1894464439
Araliaceae	Dendropanax	Dendropanax arboreus	17.636389	-92.891944	1421388381
Araliaceae	Dendropanax	Dendropanax arboreus	18.52	-95.02	1228218583
Araliaceae	Dendropanax	Dendropanax arboreus	20.316667	-97.2	1894464423
Araliaceae	Dendropanax	Dendropanax arboreus	18.466667	-95	1894464420
Araliaceae	Dendropanax	Dendropanax arboreus	18.130278	-94.529722	1893661410
Araliaceae	Dendropanax	Dendropanax arboreus	18.783333	-96.083333	1894464437
Araliaceae	Dendropanax	Dendropanax arboreus	18.333333	-94.9	1894464427
Araliaceae	Dendropanax	Dendropanax arboreus	18.206944	-94.025556	1421415920
Araliaceae	Dendropanax	Dendropanax arboreus	19.9	-96.766667	1894464436
Araliaceae	Dendropanax	Dendropanax arboreus	19.816667	-96.8	1894464428
Araliaceae	Dendropanax	Dendropanax arboreus	19.866667	-96.766667	1894464435
Araliaceae	Dendropanax	Dendropanax arboreus	18.366667	-94.9	1894464434
Araliaceae	Dendropanax	Dendropanax arboreus	19.5	-96.833333	1260857233
Araliaceae	Dendropanax	Dendropanax arboreus	19.883333	-96.8	1894464547
Araliaceae	Dendropanax	Dendropanax arboreus	19.733333	-96.8	1894464539
Araliaceae	Dendropanax	Dendropanax arboreus	18.516667	-95.15	1894464468
Araliaceae	Dendropanax	Dendropanax arboreus	19.283333	-96.916667	1894464471
Araliaceae	Dendropanax	Dendropanax arboreus	18.5669	-95.1072	1228543308
Araliaceae	Dendropanax	Dendropanax arboreus	19.983333	-96.95	1894464460
Araliaceae	Dendropanax	Dendropanax arboreus	18.366667	-94.866667	1894464445
Araliaceae	Dendropanax	Dendropanax arboreus	17.21760515	-94.7071969	1894464461
Araliaceae	Dendropanax	Dendropanax arboreus	18.33374181	-94.94333077	1894464478
Araliaceae	Dendropanax	Dendropanax arboreus	18.4	-95.066667	1894464479
Araliaceae	Dendropanax	Dendropanax arboreus	18.41741762	-95.0184128	1894464527
Araliaceae	Dendropanax	Dendropanax arboreus	19.533333	-96.483333	1894464531
Araliaceae	Dendropanax	Dendropanax arboreus	17.233333	-94.266667	1259658321
Araliaceae	Dendropanax	Dendropanax arboreus	18.366667	-94.983333	1894464506
Araliaceae	Dendropanax	Dendropanax arboreus	19.83	-96.82	1228269236
Araliaceae	Dendropanax	Dendropanax arboreus	18.446944	-95.0825	1419220910
Araliaceae	Dendropanax	Dendropanax arboreus	19.303333	-96.566111	1419190713
Araliaceae	Dendropanax	Dendropanax arboreus	18.45567393	-95.70001911	1893893216
Araliaceae	Dendropanax	Dendropanax arboreus	18.916667	-97.05	1894464352
Araliaceae	Dendropanax	Dendropanax arboreus	19.79366838	-96.67560652	1894464317
Araliaceae	Dendropanax	Dendropanax arboreus	19.3	-96.683333	1894464346
Araliaceae	Dendropanax	Dendropanax arboreus	19.22	-96.98	1228319000
Araliaceae	Dendropanax	Dendropanax arboreus	18.433333	-95.016667	1894464402
Araliaceae	Dendropanax	Dendropanax arboreus	18.43	-95.93	1228292208
Araliaceae	Dendropanax	Dendropanax arboreus	18.433333	-95.8	1894464407
Araliaceae	Dendropanax	Dendropanax arboreus	18.42	-95.1	1228567188
Araliaceae	Dendropanax	Dendropanax arboreus	19.78	-96.62	1228241753
Araliaceae	Dendropanax	Dendropanax arboreus	19.96666	-96.83333	1259893207
Araliaceae	Dendropanax	Dendropanax arboreus	19.583333	-96.816667	1894464377
Araliaceae	Dendropanax	Dendropanax arboreus	19.266667	-96.4	1894464384
Araliaceae	Dendropanax	Dendropanax arboreus	18.366667	-94.766667	1894464383
Araliaceae	Dendropanax	Dendropanax arboreus	18.58693844	-95.06695047	1894464381
Araliaceae	Dendropanax	Dendropanax arboreus	18.3101185	-94.73356071	1894464365
Araliaceae	Dendropanax	Dendropanax arboreus	18.25540577	-94.85916854	1894464370
Araliaceae	Dendropanax	Dendropanax arboreus	18.283333	-94.716667	1894464376
Araliaceae	Dendropanax	Dendropanax arboreus	18.5	-95.2	1894464372
Araliaceae	Dendropanax	Dendropanax arboreus	18.33	-94.85	1228240184
Araliaceae	Dendropanax	Dendropanax arboreus	19.533333	-96.383333	1894464398
Araliaceae	Dendropanax	Dendropanax arboreus	19.98	-96.95	1228402528
Araliaceae	Dendropanax	Dendropanax arboreus	19.775	-96.8	1894464390
Araliaceae	Dendropanax	Dendropanax arboreus	18.489722	-92.641111	1421413836
Araliaceae	Dendropanax	Dendropanax arboreus	19.225	-96.991667	1896216100
Araliaceae	Dendropanax	Dendropanax arboreus	18.810833	-96.963056	1896216097
Araliaceae	Dendropanax	Dendropanax arboreus	18.451111	-95.235833	1896216096
Araliaceae	Dendropanax	Dendropanax arboreus	19.850556	-96.745278	1896215839
Araliaceae	Dendropanax	Dendropanax arboreus	19.400833	-96.95	1896216090
Araliaceae	Dendropanax	Dendropanax arboreus	19.841667	-96.791667	1896215884
Araliaceae	Dendropanax	Dendropanax arboreus	19.341667	-96.925	1896216081
Araliaceae	Dendropanax	Dendropanax arboreus	19.925278	-96.841389	1896216094
Araliaceae	Dendropanax	Dendropanax arboreus	18.441667	-95.808333	1896216093
Araliaceae	Dendropanax	Dendropanax arboreus	17.288889	-94.625	1896216092
Araliaceae	Dendropanax	Dendropanax arboreus	19.958333	-96.858333	1896215873
Araliaceae	Dendropanax	Dendropanax arboreus	18.485556	-95.1175	1896216080
Araliaceae	Dendropanax	Dendropanax arboreus	17.693333	-95.078333	1893661419
Araliaceae	Dendropanax	Dendropanax arboreus	19.623333	-96.733333	1893661423
Araliaceae	Dendropanax	Dendropanax arboreus	17.7575	-91.294167	1258621549
Araliaceae	Dendropanax	Dendropanax arboreus	19.775	-96.808333	1896216139
Araliaceae	Dendropanax	Dendropanax arboreus	18.4864	-95.1489	1257830028
Araliaceae	Dendropanax	Dendropanax arboreus	18.333333	-94.89	1893661418
Araliaceae	Dendropanax	Dendropanax arboreus	21.825	-98.458333	1896216115
Araliaceae	Dendropanax	Dendropanax arboreus	19.386944	-96.966111	1896215827
Araliaceae	Dendropanax	Dendropanax arboreus	19.534444	-96.857222	1896216129
Araliaceae	Dendropanax	Dendropanax arboreus	19.425	-97.058333	1896216128
Araliaceae	Dendropanax	Dendropanax arboreus	18.475	-95.175	1896216126
Araliaceae	Dendropanax	Dendropanax arboreus	18.341667	-94.908333	1896216122
Araliaceae	Dendropanax	Dendropanax arboreus	18.808333	-96.941667	1896216020
Araliaceae	Dendropanax	Dendropanax arboreus	17.98333	-94.51666	415996480
Araliaceae	Dendropanax	Dendropanax arboreus	18.345833	-95.012222	1896216033
Araliaceae	Dendropanax	Dendropanax arboreus	18.289167	-94.960278	1897372756
Araliaceae	Dendropanax	Dendropanax arboreus	18.898056	-97.038611	1896216010
Araliaceae	Dendropanax	Dendropanax arboreus	18.525556	-95.046944	1896215978
Araliaceae	Dendropanax	Dendropanax arboreus	18.458333	-95.358333	1896215980
Araliaceae	Dendropanax	Dendropanax arboreus	18.333056	-94.943333	1896215976
Araliaceae	Dendropanax	Dendropanax arboreus	18.575	-95.091667	1896216000
Araliaceae	Dendropanax	Dendropanax arboreus	18.325	-94.941667	1896216060
Araliaceae	Dendropanax	Dendropanax arboreus	17.908333	-94.725	1896215904
Araliaceae	Dendropanax	Dendropanax arboreus	23.057222	-99.208611	1896216062
Araliaceae	Dendropanax	Dendropanax arboreus	22.875	-99.375	1896216065
Araliaceae	Dendropanax	Dendropanax arboreus	19.196389	-97.045833	1896215898
Araliaceae	Dendropanax	Dendropanax arboreus	19.825	-96.808333	1896215902
Araliaceae	Dendropanax	Dendropanax arboreus	19.975	-96.841667	1896215932
Araliaceae	Dendropanax	Dendropanax arboreus	18.339444	-94.856111	1896215943
Araliaceae	Dendropanax	Dendropanax arboreus	18.375	-95.375	1896216051
Araliaceae	Dendropanax	Dendropanax arboreus	19.791338	-96.675416	1896215922
Araliaceae	Dendropanax	Dendropanax arboreus	18.158333	-94.325	1893411423
Araliaceae	Dendropanax	Dendropanax arboreus	17.441667	-94.875	1893411422
Araliaceae	Dendropanax	Dendropanax arboreus	18.775	-96.925	1893411433
Araliaceae	Dendropanax	Dendropanax arboreus	18.441667	-95.141667	1893411395
Araliaceae	Dendropanax	Dendropanax arboreus	18.408333	-95.066667	1893661444
Araliaceae	Dendropanax	Dendropanax arboreus	18.808333	-96.975	1893411420
Araliaceae	Dendropanax	Dendropanax arboreus	17.37	-91.12	1258621491
Araliaceae	Dendropanax	Dendropanax arboreus	20.391667	-97.641667	1893411416
Araliaceae	Dendropanax	Dendropanax arboreus	18.408333	-95.025	1893411411
Araliaceae	Dendropanax	Dendropanax arboreus	19.541667	-96.841667	1893411454
Araliaceae	Dendropanax	Dendropanax arboreus	19.941667	-96.925	1893411451
Araliaceae	Dendropanax	Dendropanax arboreus	20.6711	-97.2064	1228623461
Araliaceae	Dendropanax	Dendropanax arboreus	17.305556	-94.636111	1893309152
Araliaceae	Dendropanax	Dendropanax arboreus	19.653333	-96.873611	1896216223
Araliaceae	Dendropanax	Dendropanax arboreus	19.408611	-96.916667	1896216213
Araliaceae	Dendropanax	Dendropanax arboreus	18.375	-94.875	1896216228
Araliaceae	Dendropanax	Dendropanax arboreus	19.503333	-96.615	1896216227
Araliaceae	Dendropanax	Dendropanax arboreus	18.908333	-97.008333	1896216199
Araliaceae	Dendropanax	Dendropanax arboreus	19.841667	-96.808333	1893411379
Araliaceae	Dendropanax	Dendropanax arboreus	18.391667	-95.025	1893411361
Araliaceae	Dendropanax	Dendropanax arboreus	19.75	-96.67	1228607523
Araliaceae	Dendropanax	Dendropanax arboreus	18.5042	-95.0356	1228189643
Araliaceae	Dendropanax	Dendropanax arboreus	18.991667	-97.125	1893411360
Araliaceae	Dendropanax	Dendropanax arboreus	17.241667	-94.508333	1419226103
Araliaceae	Dendropanax	Dendropanax arboreus	19.894444	-97.108889	1896216167
Araliaceae	Dendropanax	Dendropanax arboreus	18.558333	-95.825	1893411359
Araliaceae	Oreopanax	Oreopanax capitatus	19.50833	-97.09167	1896190994
Araliaceae	Oreopanax	Oreopanax capitatus	19.79	-96.83778	1896190996
Araliaceae	Oreopanax	Oreopanax capitatus	19.30833	-96.80833	1896190999
Araliaceae	Oreopanax	Oreopanax capitatus	19.57083	-97.00611	1896190995
Araliaceae	Oreopanax	Oreopanax capitatus	18.35833	-94.925	1896191000
Araliaceae	Oreopanax	Oreopanax capitatus	17.25472	-94.61639	1896226846
Araliaceae	Oreopanax	Oreopanax capitatus	19.15833	-96.975	1896226844
Araliaceae	Oreopanax	Oreopanax capitatus	19.75029	-96.69078	1895395001
Araliaceae	Oreopanax	Oreopanax capitatus	19.61667	-96.93333	1894463226
Araliaceae	Oreopanax	Oreopanax capitatus	19.58756	-97.00922	1895395016
Araliaceae	Oreopanax	Oreopanax capitatus	19.11667	-97.12639	1896191011
Araliaceae	Oreopanax	Oreopanax capitatus	19.79278	-96.74028	1896191010
Araliaceae	Oreopanax	Oreopanax capitatus	19.13833	-97.10389	1896191007
Araliaceae	Oreopanax	Oreopanax capitatus	19.6	-96.95	1894463217
Araliaceae	Oreopanax	Oreopanax capitatus	19.625	-96.93333	1896191012
Araliaceae	Oreopanax	Oreopanax capitatus	19.625	-97.10833	1896191013
Araliaceae	Oreopanax	Oreopanax capitatus	19.42556	-97.07639	1896191015
Araliaceae	Oreopanax	Oreopanax capitatus	17.44167	-91.14167	1896191023
Araliaceae	Oreopanax	Oreopanax capitatus	19.51667	-96.61667	1259654063
Araliaceae	Oreopanax	Oreopanax capitatus	19.47333	-97.00417	1896191018
Araliaceae	Oreopanax	Oreopanax capitatus	19.475	-97.09167	1896191022
Araliaceae	Oreopanax	Oreopanax capitatus	18.91667	-96.91667	1894463902
Araliaceae	Oreopanax	Oreopanax capitatus	18.46667	-95	1894463892
Araliaceae	Oreopanax	Oreopanax capitatus	17.425	-94.45833	1896226848
Araliaceae	Oreopanax	Oreopanax capitatus	19.15	-97	1894463891
Araliaceae	Oreopanax	Oreopanax capitatus	19.39806	-97.07056	1896226838
Araliaceae	Oreopanax	Oreopanax capitatus	17.25056	-94.61306	1896226866
Araliaceae	Oreopanax	Oreopanax capitatus	19.68333	-96.91667	1894463910
Araliaceae	Oreopanax	Oreopanax capitatus	19.1375	-97.01722	1893310056
Araliaceae	Oreopanax	Oreopanax capitatus	18.925	-97.14167	1896226871
Araliaceae	Oreopanax	Oreopanax capitatus	19.427	-97.06736	1894463904
Araliaceae	Oreopanax	Oreopanax capitatus	19.42201	-97.00838	1894463847
Araliaceae	Oreopanax	Oreopanax capitatus	19.46667	-97.08333	1894463239
Araliaceae	Oreopanax	Oreopanax capitatus	19.44863	-97.06773	1894463240
Araliaceae	Oreopanax	Oreopanax capitatus	19.45028	-96.94278	1896226842
Araliaceae	Oreopanax	Oreopanax capitatus	18.825	-96.825	1893414364
Araliaceae	Oreopanax	Oreopanax capitatus	19.11333	-97.01306	1896226829
Araliaceae	Oreopanax	Oreopanax capitatus	19.34861	-96.99861	1896226825
Araliaceae	Oreopanax	Oreopanax capitatus	18.35	-94.91667	1894463243
Araliaceae	Oreopanax	Oreopanax capitatus	19.475	-97.01667	1896226800
Araliaceae	Oreopanax	Oreopanax capitatus	18.44167	-95.175	1896226811
Araliaceae	Oreopanax	Oreopanax capitatus	18.58	-95.15	1228328307
Araliaceae	Oreopanax	Oreopanax capitatus	19.825	-96.80417	1418344005
Araliaceae	Oreopanax	Oreopanax capitatus	18.60406	-96.68727	1895509836
Araliaceae	Oreopanax	Oreopanax capitatus	19.11306	-97.01306	1895510014
Araliaceae	Oreopanax	Oreopanax capitatus	19.54062	-96.92755	1895510005
Araliaceae	Oreopanax	Oreopanax capitatus	19.77083	-96.69722	1893306425
Araliaceae	Oreopanax	Oreopanax capitatus	19.39869	-97.07061	1894463815
Araliaceae	Oreopanax	Oreopanax capitatus	18.36111	-94.91667	1418347547
Araliaceae	Oreopanax	Oreopanax capitatus	19.57145	-97.00616	1895394893
Araliaceae	Oreopanax	Oreopanax capitatus	19.0848	-97.02428	1895394956
Araliaceae	Oreopanax	Oreopanax capitatus	18.35187	-94.90921	1895394971
Araliaceae	Oreopanax	Oreopanax capitatus	19.89167	-96.80833	1896191036
Araliaceae	Oreopanax	Oreopanax capitatus	19.74139	-96.81861	1896191047
Araliaceae	Oreopanax	Oreopanax capitatus	19.74972	-96.69417	1896191042
Araliaceae	Oreopanax	Oreopanax capitatus	18.44167	-95.94167	1896191040
Araliaceae	Oreopanax	Oreopanax capitatus	19.56	-97.24278	1896191037
Araliaceae	Oreopanax	Oreopanax capitatus	17.25	-94.61667	1421402970
Araliaceae	Oreopanax	Oreopanax capitatus	19.83333	-96.81667	1259885066
Araliaceae	Oreopanax	Oreopanax capitatus	19.47	-96.93	1228169663
Araliaceae	Oreopanax	Oreopanax capitatus	19.67719	-96.85381	1418345728
Araliaceae	Oreopanax	Oreopanax capitatus	19.41667	-97.05	1894463887
Araliaceae	Oreopanax	Oreopanax capitatus	17.4078	-91.4117	1319696072
Araliaceae	Oreopanax	Oreopanax capitatus	19.6825	-96.91972	1896226895
Araliaceae	Oreopanax	Oreopanax capitatus	19.78333	-96.81666	1259665429
Araliaceae	Oreopanax	Oreopanax capitatus	18.58333	-95.16667	1894463994
Araliaceae	Oreopanax	Oreopanax capitatus	19.43333	-97.01667	1894463168
Araliaceae	Oreopanax	Oreopanax capitatus	19.47	-97.08	1228373452
Araliaceae	Oreopanax	Oreopanax capitatus	19.5	-96.83333	1260857280
Araliaceae	Oreopanax	Oreopanax capitatus	19.13333	-97.05	1894463867
Araliaceae	Oreopanax	Oreopanax capitatus	19.425	-97.04167	1893399507
Araliaceae	Oreopanax	Oreopanax capitatus	19.14028	-97.02222	1896226880
Araliaceae	Oreopanax	Oreopanax capitatus	17.55833	-92.85833	1896226890
Araliaceae	Oreopanax	Oreopanax capitatus	19.55306	-96.93778	1418339656
Araliaceae	Oreopanax	Oreopanax capitatus	19.59167	-97.05833	1419225562
Araliaceae	Oreopanax	Oreopanax capitatus	18.88583	-97.10417	1896226889
Araliaceae	Oreopanax	Oreopanax capitatus	19.13167	-97.07667	1893604539
Araliaceae	Oreopanax	Oreopanax capitatus	19.79	-96.85667	1893604503
Araliaceae	Oreopanax	Oreopanax capitatus	19.5275	-96.97333	1896226882
Araliaceae	Oreopanax	Oreopanax capitatus	19.83333	-96.83333	1894463187
Araliaceae	Oreopanax	Oreopanax capitatus	17.31666	-94.38333	1259665018
Araliaceae	Oreopanax	Oreopanax capitatus	18.43333	-95.93333	1894463208
Araliaceae	Oreopanax	Oreopanax capitatus	19.66806	-97.15361	1896226912
Araliaceae	Oreopanax	Oreopanax capitatus	18.46417	-94.97694	1896226909
Araliaceae	Oreopanax	Oreopanax capitatus	19.78333	-96.81667	1894463210
Araliaceae	Oreopanax	Oreopanax capitatus	17.325	-94.38333	1896226894
Araliaceae	Oreopanax	Oreopanax capitatus	19.76667	-96.68333	1894463189
Araliaceae	Oreopanax	Oreopanax capitatus	19.58333	-97.05	1894463196
Araliaceae	Oreopanax	Oreopanax capitatus	17.325	-94.39167	1419232854
Araliaceae	Oreopanax	Oreopanax capitatus	19.6	-97	1894463198
Araliaceae	Oreopanax	Oreopanax capitatus	19.56234	-97.01519	1894463202
Araliaceae	Oreopanax	Oreopanax capitatus	19.52083	-96.99167	1896226877
Araliaceae	Oreopanax	Oreopanax capitatus	19.42	-97.02	1228377598
Araliaceae	Oreopanax	Oreopanax capitatus	19.66667	-97.15	1894463863
Araliaceae	Oreopanax	Oreopanax capitatus	19.54444	-96.96111	1894463956
Araliaceae	Oreopanax	Oreopanax capitatus	18.31666	-94.81666	1259663057
Araliaceae	Oreopanax	Oreopanax capitatus	18.58644	-96.7035	1894463846
Araliaceae	Oreopanax	Oreopanax capitatus	19.12167	-97.00167	1893666452
Araliaceae	Oreopanax	Oreopanax capitatus	19.51667	-96.83333	1894463922
Araliaceae	Oreopanax	Oreopanax capitatus	19.21667	-96.98333	1894463918
Araliaceae	Oreopanax	Oreopanax capitatus	18.43333	-95.16667	1894463931
Araliaceae	Oreopanax	Oreopanax capitatus	19.53438	-96.97894	1894463935
Araliaceae	Oreopanax	Oreopanax capitatus	19.7497	-96.6942	1228540328
Araliaceae	Oreopanax	Oreopanax capitatus	19.21667	-96.65	1894463946
Araliaceae	Oreopanax	Oreopanax capitatus	18.7811	-96.9794	1228268661
Araliaceae	Oreopanax	Oreopanax capitatus	19.14	-97.02167	1893666427
Araliaceae	Oreopanax	Oreopanax capitatus	19.49	-97.04	1897352282
Araliaceae	Oreopanax	Oreopanax capitatus	18.66667	-96.98333	1894464016
Araliaceae	Oreopanax	Oreopanax capitatus	19.5	-97.08333	1894463166
Araliaceae	Oreopanax	Oreopanax capitatus	18.32	-94.82	1228382234
Araliaceae	Oreopanax	Oreopanax capitatus	18.45833	-94.89167	1896226852
Araliaceae	Oreopanax	Oreopanax capitatus	19.3	-96.8	1228382802
Araliaceae	Oreopanax	Oreopanax echinops	19.15	-96.88	1228529159
Araliaceae	Oreopanax	Oreopanax echinops	19.71635	-97.10432	1894465081
Araliaceae	Oreopanax	Oreopanax echinops	18.78	-97.08	1228317603
Araliaceae	Oreopanax	Oreopanax echinops	19.53333	-96.91667	1894465179
Araliaceae	Oreopanax	Oreopanax echinops	19.41667	-97	1894465051
Araliaceae	Oreopanax	Oreopanax echinops	19.65833	-97.14167	1896216437
Araliaceae	Oreopanax	Oreopanax echinops	19.13333	-97.03333	1894465077
Araliaceae	Oreopanax	Oreopanax echinops	19.56667	-96.86667	1894465063
Araliaceae	Oreopanax	Oreopanax echinops	19.4	-96.98	1228604058
Araliaceae	Oreopanax	Oreopanax echinops	19.18745	-96.95322	1895480719
Araliaceae	Oreopanax	Oreopanax echinops	19.50833	-96.89167	1893388794
Araliaceae	Oreopanax	Oreopanax echinops	18.72171	-97.06348	1895480737
Araliaceae	Oreopanax	Oreopanax echinops	18.15833	-95.2	415990197
Araliaceae	Oreopanax	Oreopanax echinops	19.78	-96.82	1228287900
Araliaceae	Oreopanax	Oreopanax echinops	19.26083	-96.8675	1896216439
Araliaceae	Oreopanax	Oreopanax echinops	19.13333	-96.95	1896216462
Araliaceae	Oreopanax	Oreopanax echinops	19.65	-97.13333	1894465168
Araliaceae	Oreopanax	Oreopanax echinops	19.12	-97.08	1228151739
Araliaceae	Oreopanax	Oreopanax echinops	19.10833	-97.075	1896216436
Araliaceae	Oreopanax	Oreopanax echinops	19.38333	-96.97167	1894465113
Araliaceae	Oreopanax	Oreopanax echinops	19.79083	-96.815	1896216467
Araliaceae	Oreopanax	Oreopanax echinops	19.1487	-97.03744	1894465086
Araliaceae	Oreopanax	Oreopanax echinops	19.1	-97.06167	1893594883
Araliaceae	Oreopanax	Oreopanax echinops	18.91667	-96.88333	1894465127
Araliaceae	Oreopanax	Oreopanax echinops	19.12222	-96.82139	1896216407
Araliaceae	Oreopanax	Oreopanax echinops	18.79167	-97.09167	1896216430
Araliaceae	Oreopanax	Oreopanax echinops	19.57361	-96.90417	1896216447
Araliaceae	Oreopanax	Oreopanax echinops	18.91666	-96.88333	1259658515
Araliaceae	Oreopanax	Oreopanax echinops	19.535	-96.92	1228387748
Araliaceae	Oreopanax	Oreopanax flaccidus	19.60778	-97.02556	1896314036
Araliaceae	Oreopanax	Oreopanax flaccidus	19.5711	-97.0428	1228593662
Araliaceae	Oreopanax	Oreopanax flaccidus	20.655	-98.425	1893631275
Araliaceae	Oreopanax	Oreopanax flaccidus	19.58333	-97.18333	1895358044
Araliaceae	Oreopanax	Oreopanax flaccidus	19.67333	-96.79611	1896314030
Arecaceae	Acrocomia	Acrocomia aculeata	19.188333	-96.14	1893737418
Arecaceae	Acrocomia	Acrocomia aculeata	17.8404	-93.6298	1989510131
Arecaceae	Acrocomia	Acrocomia aculeata	18.058333	-94.191667	1893416753
Arecaceae	Acrocomia	Acrocomia aculeata	18.258333	-94.861111	1418343326
Arecaceae	Acrocomia	Acrocomia aculeata	19.6975	-96.840556	1896349314
Arecaceae	Acrocomia	Acrocomia aculeata	19.608333	-96.491667	1896349320
Arecaceae	Acrocomia	Acrocomia aculeata	21.265278	-97.542778	1896349322
Arecaceae	Acrocomia	Acrocomia aculeata	19.447778	-96.896111	1896349325
Arecaceae	Acrocomia	Acrocomia aculeata	21.658333	-97.848333	1896349334
Arecaceae	Acrocomia	Acrocomia aculeata	18.254722	-94.859167	1896349304
Arecaceae	Acrocomia	Acrocomia aculeata	18.208333	-95.158333	1896349307
Arecaceae	Acrocomia	Acrocomia aculeata	22.186111	-98.010278	1896349308
Arecaceae	Acrocomia	Acrocomia aculeata	18.151389	-92.769167	1894873922
Arecaceae	Acrocomia	Acrocomia aculeata	19.396667	-96.788333	1896349311
Arecaceae	Acrocomia	Acrocomia aculeata	18.918056	-96.758333	1896349310
Arecaceae	Acrocomia	Acrocomia aculeata	18.95	-96.13	1930497667
Arecaceae	Acrocomia	Acrocomia aculeata	19.2061	-96.2736	1928855121
Arecaceae	Acrocomia	Acrocomia aculeata	19.32	-96.33	1897379988
Arecaceae	Acrocomia	Acrocomia aculeata	19.206111	-96.273611	1896349337
Arecaceae	Acrocomia	Acrocomia aculeata	18.975	-96.125	1896349345
Arecaceae	Acrocomia	Acrocomia aculeata	18.95	-96.13333	1259751965
Arecaceae	Acrocomia	Acrocomia aculeata	18.733828	-95.797011	1895515802
Arecaceae	Acrocomia	Acrocomia aculeata	19.36173907	-96.80949231	1893825229
Arecaceae	Acrocomia	Acrocomia aculeata	17.615	-95.731667	1896349301
Arecaceae	Acrocomia	Acrocomia aculeata	20.46779795	-97.16839349	1893825217
Arecaceae	Acrocomia	Acrocomia aculeata	18.27541	-95.30756	3308738033
Arecaceae	Acrocomia	Acrocomia aculeata	19.216667	-96.165555	2629679051
Arecaceae	Acrocomia	Acrocomia aculeata	17.615	-95.73167	3308730566
Arecaceae	Acrocomia	Acrocomia aculeata	19.133333	-96.183333	2629515999
Arecaceae	Acrocomia	Acrocomia aculeata	19.217	-96.233	3307960956
Arecaceae	Acrocomia	Acrocomia aculeata	18.666667	-96.666667	2629568385
Arecaceae	Acrocomia	Acrocomia aculeata	19.6	-96.483333	2629560117
Arecaceae	Acrocomia	Acrocomia aculeata	18.966667	-96.116667	2629471155
Arecaceae	Acrocomia	Acrocomia aculeata	18.95	-96.133	3307936326
Arecaceae	Acrocomia	Acrocomia aculeata	19.2	-96.3	3308445775
Arecaceae	Acrocomia	Acrocomia aculeata	18.74	-95.7	1258558344
Arecaceae	Acrocomia	Acrocomia aculeata	18.2	-95.15	2629544247
Arecaceae	Acrocomia	Acrocomia aculeata	18.7166	-95.7854	122896634
Arecaceae	Acrocomia	Acrocomia aculeata	19.6975	-96.840555	2629566357
Arecaceae	Astrocaryum	Astrocaryum mexicanum	18.475	-94.925	1894897009
Arecaceae	Astrocaryum	Astrocaryum mexicanum	18.141667	-94.458333	1893428967
Arecaceae	Astrocaryum	Astrocaryum mexicanum	18.491667	-95.041667	1893429027
Arecaceae	Astrocaryum	Astrocaryum mexicanum	17.543333	-92.803333	1893640252
Arecaceae	Astrocaryum	Astrocaryum mexicanum	17.775	-94.641667	1896212903
Arecaceae	Astrocaryum	Astrocaryum mexicanum	18.462858	-95.332834	1896212902
[truncated: 14,169 more rows]
